# Supplementary material for: Cytosine base modifications regulate DNA duplex stability and metabolism
Source: PubMed Central journal article supplement (PMC8682791; doi:10.1093/nar/gkab509), 2021-06-16
Supplement: gkab509_supplemental_file.pdf [file gkab509_supplemental_file.pdf]

## **Cytosine base modifications regulate DNA duplex stability and metabolism**

Cathia Rausch<sup>1</sup>, Peng Zhang<sup>1,2,\*</sup>, Corella S. Casas-Delucchi<sup>3,#</sup>, Julia L. Daiß<sup>4,#</sup>, Christoph Engel<sup>4</sup>, Gideon Coster<sup>3</sup>, Florian D. Hastert<sup>1</sup>, Patrick Weber<sup>1</sup> and M. Cristina Cardoso<sup>1,\*</sup>

<sup>1</sup> Cell Biology and Epigenetics, Department of Biology, Technical University of Darmstadt, 64287 Darmstadt, Germany.

<sup>2</sup> Center for Tissue Engineering and Stem Cell Research, Guizhou Medical University, Guiyang, Guizhou, China, 550004.

<sup>3</sup> The Institute of Cancer Research, Chester Beatty Laboratories, London SW3 6JB, United Kingdom.

<sup>4</sup> Regensburg Center for Biochemistry, University of Regensburg, 93053 Regensburg, Germany.

# These authors contributed equally to this work.

\* To whom correspondence should be addressed: M. Cristina Cardoso: Tel: +49 6151 16 21882; Fax: +49 6151 16 21880; Email: [cardoso@bio.tu-darmstadt.de](mailto:cardoso@bio.tu-darmstadt.de).

Correspondence may also be addressed to: Peng Zhang: Tel/Fax: +86 85180988028; Email: [peng12zhang@outlook.com](mailto:peng12zhang@outlook.com).

Present address: Florian D. Hastert, Paul-Ehrlich-Institut, Bundesinstitut für Impfstoffe und biomedizinische Arzneimittel, 63225 Langen, Germany.

## SUPPLEMENTARY TABLES, FIGURES AND FIGURE LEGENDS

Supplementary Table 1: Oligonucleotide characteristics.

| Name                       | Sequence [5' - 3']                                                                                 | Application                                            | Reference  |
|----------------------------|----------------------------------------------------------------------------------------------------|--------------------------------------------------------|------------|
| AgeI-miRFP-fw              | ATC CAC CCG TCG CCA<br>CCA TGG TA                                                                  | cloning                                                | this study |
| BsrGI-miRFP-rev            | AAA TGT ACA GGC TCT<br>CAA GCG CGG TGA T                                                           | cloning                                                | this study |
| MaSat-fw                   | AAA ATG AGA AAC ATC<br>CAC TTG                                                                     | FISH probe generation                                  | (1)        |
| MaSat-rev                  | CCA TGA TTT TCA GTT<br>TTC TT                                                                      | FISH probe generation                                  | (1)        |
| CG-up                      | ACT ACC ATC XGG ACC<br>AGA AG*                                                                     | HRM                                                    | (2)        |
| CG-down                    | CTT CTG GTC XGG ATG<br>GTA GT*                                                                     | HRM                                                    | (2)        |
| MINX-fw                    | CGG TAC CTA ATA CGA<br>CTC ACT ATA GGG AGA                                                         | PCR fragment, replication &<br>IVT template generation | (2)        |
| MINX-5'P-fw                | 5'Phospho-CGG TAC CTA<br>ATA CGA CTC ACT ATA                                                       | 5' phosphorylated IVT<br>template generation           | this study |
| MINX-rev                   | GTG CCA AGC TTG CAT<br>GC                                                                          | PCR fragment & IVT template<br>generation              | (2)        |
| LINE1-fw                   | ATC CCA CAC CTG GCT<br>CAG AGG G                                                                   | PCR fragment generation                                | (3)        |
| LINE1-rev                  | GTC AGG GGT CAG GGA<br>CCC ACT T                                                                   | PCR fragment generation                                | (3)        |
| GC497                      | GAT CCT TAA TTA ACC<br>TCA GCT TGA CCA TGA<br>CTC GAC TGC AAT CGC<br>CCT CAG CGC GGC CGC<br>CTG CA | cloning                                                | this study |
| GC498                      | GGC GGC CGC GCT<br>GAG GGC GAT TGC AGT<br>CGA GTC ATG GTC AAG<br>CTG AGG TTA ATT AAG               | cloning                                                | this study |
| pGC504-3kb-fw              | TTC TAA ACC ATT GCC<br>GCT TAC TC                                                                  | yeast replication template<br>generation               | this study |
| pGC504-3kb-rev             | CCG TAT CGT AGT TAT<br>CTA CAC GAC                                                                 | yeast replication template<br>generation               | this study |
| MINX-400bp-tailed-fw       | ATC ACC TTA CCC TAT<br>ACT TAC TCG CAT TCC<br>CGG TAC CTA ATA CGA<br>CTC ACT ATA                   | yeast IVT template<br>generation                       | this study |
| MINX-400bp-tailed-rev      | GTG CCA AGC TTG CAT<br>GCC TGC                                                                     | yeast IVT template<br>generation                       | this study |
| Competitor oligonucleotide | CGA GTA AGT ATA GGG<br>TAA GGT GAT                                                                 | yeast IVT template<br>generation                       | (4)        |

\* X: cytosine, 5-methyl, 5-hydroxymethyl, 5-formyl or 5-carboxyl cytosine.

**Supplementary Table 2: Plasmid characteristics.**

| Name          | pc number* | Fluorophore | Gene species             | Promoter | Reference  |
|---------------|------------|-------------|--------------------------|----------|------------|
| mch-mTet1CD   | 2547       | mcherry     | Mus musculus             | CAG      | (5)        |
| mcherry       | 2387       | mcherry     | Discosoma sp.            | CMV      | (5)        |
| mRFP-hPCNA    | 1054       | mRFP        | Homo sapiens             | CMV      | (6)        |
| miRFP-hPCNA   | 3385       | miRFP670    | Homo sapiens             | CMV      | this study |
| GFP-hRPA34    | 624        | GFP         | Homo sapiens             | CMV      | (7)        |
| pUC18-MINX-M3 | 3902       | -           | -                        | T7       | (8)        |
| pGC504 ARS306 | 4625       | -           | Saccharomyces cerevisiae | -        | this study |

\* pc number: plasmid collection number.

**Supplementary Table 3: Cell line characteristics.**

| Name    | Species      | Type                 | Genotype                                                             | Reference |
|---------|--------------|----------------------|----------------------------------------------------------------------|-----------|
| C2C12   | Mus musculus | myoblast             | wildtype                                                             | (9)       |
| MEF W8  | Mus musculus | embryonic fibroblast | wildtype                                                             | (10)      |
| MEF PM  | Mus musculus | embryonic fibroblast | p53 <sup>-/-</sup> & Dnmt1 <sup>-/-</sup>                            | (11)      |
| HEK 293 | Homo sapiens | embryonic kidney     | wildtype                                                             | (12)      |
| J1 wt   | Mus musculus | embryonic stem cell  | wildtype                                                             | (13)      |
| J1 TKO  | Mus musculus | embryonic stem cell  | Dnmt1 <sup>-/-</sup> & Dnmt3a <sup>-/-</sup> & Dnmt3b <sup>-/-</sup> | (14)      |

**Supplementary Table 4: Nucleotide and nucleoside characteristics.**

| Name                                                 | Application                                                                            | Cat #     | Company                                    |
|------------------------------------------------------|----------------------------------------------------------------------------------------|-----------|--------------------------------------------|
| Biotin-16-dUTP                                       | labeling of FISH probes                                                                | -         | selfmade (1)                               |
| EdU (5-ethynyl-2'-deoxyuridine)                      | labeling of nascent DNA                                                                | E10415    | Thermo Fisher Scientific, Waltham, MA, USA |
| BrdU (5-bromo-2'-deoxyuridine)                       | labeling of nascent DNA                                                                | B5002     | Sigma-Aldrich, St Louis, MO, USA           |
| Thymidine                                            | labeling of nascent DNA (during chase time)                                            | T9250     | Sigma-Aldrich, St Louis, MO, USA           |
| EU* (5-ethynyl-uridine)                              | labeling of nascent RNA                                                                | E10345    | Thermo Fisher Scientific, Waltham, MA, USA |
| dATP, dTTP & dGTP                                    | PCR & <i>in vitro</i> replication                                                      | 10297018  | Thermo Fisher Scientific, Waltham, MA, USA |
| dCTP                                                 | PCR, manipulation of C modification level (transfection) & <i>in vitro</i> replication | 10297018  | Thermo Fisher Scientific, Waltham, MA, USA |
| d5mCTP                                               | PCR & manipulation of C modification level (transfection)                              | NU-1125   | Jena Bioscience, Jena, Germany             |
| d5hmCTP                                              | PCR & manipulation of C modification level (transfection)                              | NU-932    | Jena Bioscience, Jena, Germany             |
| d5fCTP                                               | PCR                                                                                    | N-2064    | Trilink, San Diego, CA, USA                |
| d5caCTP                                              | PCR                                                                                    | N-2063    | Trilink, San Diego, CA, USA                |
| $\alpha^{33}\text{P}$ -dATP, 3000 Ci/mmol, 20 mCi/ml | <i>in vitro</i> yeast replication assay                                                | SRF-203H  | Hartmann Analytic, Braunschweig, Germany   |
| Cy3-dUTP                                             | labeling of nascent DNA (transfection)                                                 | PA53022   | GE Healthcare, Chicago, IL, USA            |
| ATP, UTP, CTP & GTP*                                 | <i>in vitro</i> T7 run-off transcription & <i>in vitro</i> yeast replication           | 18109-017 | Thermo Fisher Scientific, Waltham, MA, USA |
| $\alpha^{32}\text{P}$ -CTP*, 400 Ci/mmol, 10 mCi/ml  | <i>in vitro</i> transcription assay                                                    | SRP-109   | Hartmann Analytic, Braunschweig, Germany   |
| 5-iodo-2'-deoxyuridine (IdU)                         | molecular DNA combing                                                                  | I7125     | Sigma-Aldrich, St Louis, MO, USA           |
| 5-chloro-2'-deoxyuridine (CldU)                      | molecular DNA combing                                                                  | C6891     | Sigma-Aldrich, St Louis, MO, USA           |

\* ribonucleotides for RNA synthesis.

**Supplementary Table 5: Primary and secondary antibody characteristics.**

| Reactivity                      | Host   | Dilution     | Application                                  | Cat #       | Company/Reference                                |
|---------------------------------|--------|--------------|----------------------------------------------|-------------|--------------------------------------------------|
| anti-PCNA (PC-10)               | mouse  | 1:100/1:1000 | IF*/WB**                                     | M0879       | Dako, Hamburg, Germany                           |
| anti-5mC (33D3)                 | mouse  | 1:150/1:1000 | IF/Slot Blot                                 | 39649       | Active Motif, La Hulpe, Belgium                  |
| anti-5hmC                       | rabbit | 1:250/1:5000 | IF/Slot Blot                                 | 39769       | Active Motif, La Hulpe, Belgium                  |
| anti-BrdU                       | rabbit | 1:500        | IF                                           | 600-401-C29 | Rockland Immunochemicals Inc., Limerick, PA, USA |
| anti-H3 acetyl                  | rabbit | 1:200        | IF                                           | 06-599      | Upstate, Lake Placid, NY, USA                    |
| anti-H3K9ac (1B10)              | mouse  | 1:500        | IF                                           | 61251       | Active Motif, La Hulpe, Belgium                  |
| anti-H3K18ac (EP959Y)           | rabbit | 1:200        | IF                                           | ab40888     | Abcam, Cambridge, UK                             |
| anti-H3K27ac                    | rabbit | 1:200        | IF                                           | 4353        | Cell Signaling Technology, Danvers, MA, USA      |
| anti-H3K56ac (EPR996Y)          | rabbit | 1:100        | IF                                           | ab76307     | Abcam, Cambridge, UK                             |
| anti-H4K8ac                     | rabbit | 1:100        | IF                                           | 06-760      | Upstate, Lake Placid, NY, USA                    |
| anti-H4K16ac                    | rabbit | 1:200        | IF                                           | 39167       | Active Motif, La Hulpe, Belgium                  |
| anti-H3K9m3                     | rabbit | 1:200        | IF                                           | 39161       | Active Motif, La Hulpe, Belgium                  |
| anti-H4K20m3                    | rabbit | 1:500        | IF                                           | ab9053      | Abcam, Cambridge, UK                             |
| anti-RFP (5F8)                  | rat    | 1:10         | IF/FISH                                      | -           | (15)                                             |
| anti-5fC                        | rabbit | 1:2000       | Slot Blot                                    | 61223       | Active Motif, La Hulpe, Belgium                  |
| anti-5caC                       | rabbit | 1:2000       | Slot Blot                                    | 61225       | Active Motif, La Hulpe, Belgium                  |
| anti-BrdU/IdU (B44)             | mouse  | 1:200        | molecular combing IF                         | 347580      | Becton Dickinson, Franklin Lakes, NJ, USA        |
| anti-BrdU/CldU (BU1/75 (ICR1))  | rat    | 1:200        | molecular combing IF                         | OBT003 0CX  | Biorad, Puchheim, Germany                        |
| anti-ssDNA (16-19, IgG2a)       | mouse  | 1:200        | molecular combing IF                         | MAB303 4    | Millipore, Burlington, MA, USA                   |
| anti-mouse IgG Chromeo 488      | goat   | 1:1000       | IF (fluorescent secondary)                   | 15031       | Active Motif, La Hulpe, Belgium                  |
| anti-rabbit IgG AMCA            | donkey | 1:00         | IF (fluorescent secondary)                   | 715-155-151 | The Jackson Laboratory, Bar Harbor, ME, USA      |
| anti-rabbit IgG Chromeo 488     | goat   | 1:1000       | IF (fluorescent secondary)                   | 15041       | Active Motif, La Hulpe, Belgium                  |
| anti-mouse IgG Cy3              | donkey | 1:300        | IF (fluorescent secondary)                   | 715-165-151 | The Jackson Laboratory, Bar Harbor, ME, USA      |
| anti-rat IgG Cy3                | donkey | 1:300        | IF/FISH (fluorescent secondary)              | 712-165-153 | The Jackson Laboratory, Bar Harbor, ME, USA      |
| anti-rabbit IgG Cy3             | donkey | 1:300        | IF (fluorescent secondary)                   | 711-165-152 | The Jackson Laboratory, Bar Harbor, ME, USA      |
| anti-rabbit IgG Cy5             | donkey | 1:300        | IF (fluorescent secondary)                   | 711-175-152 | The Jackson Laboratory, Bar Harbor, ME, USA      |
| anti-mouse IgG HRP              | sheep  | 1:5000       | Slot blot (HRP*** conj. secondary)           | NA 931V     | GE Healthcare, Chicago, IL, USA                  |
| anti-rabbit IgG HRP             | goat   | 1:5000       | Slot blot (HRP conj. secondary)              | A0545       | Sigma-Aldrich, St Louis, MO, USA                 |
| anti-mouse IgG Chromeo 546      | goat   | 1:200        | molecular combing IF (fluorescent secondary) | 15033       | Active Motif, La Hulpe, Belgium                  |
| anti-rat IgG AlexaFluor 488     | donkey | 1:200        | molecular combing IF (fluorescent secondary) | 712-545-153 | The Jackson Laboratory, Bar Harbor, ME, USA      |
| anti-mouse IgG2a AlexaFluor 647 | goat   | 1:200        | molecular combing IF (fluorescent secondary) | A-21241     | Fisher Scientific GmbH, Hampton, NH, USA         |

\* IF: immunofluorescence, \*\* WB: western blot; \*\*\* HRP: horseradish peroxidase.

Supplementary Table 6: Imaging system characteristics.

| Microscope /Company                                                                              | Lasers/lamps                                                            | Filters (ex. & em. [nm])*                                                         | Objectives/ lenses                              | Detection system                                           | Incubation system                                                                    | Application                                      |
|--------------------------------------------------------------------------------------------------|-------------------------------------------------------------------------|-----------------------------------------------------------------------------------|-------------------------------------------------|------------------------------------------------------------|--------------------------------------------------------------------------------------|--------------------------------------------------|
| Ultra-View VoX spinning disk on an inverted Nikon Ti-E microscope/ PerkinElmer Life Sciences, UK | solid state diode lasers (405 nm, 488 nm, 561 nm, 640 nm)               | 405/488/568/640**<br>405: 415–475<br>488: 505–549<br>561: 580–650<br>640: 664–754 | oil immersion 60x Plan-Apochromat (NA 1.45)     | cooled 14-bit Hamamatsu® C9100-50 EMCCD                    | closed live-cell microscopy chamber (ACU control, Olympus) for time-lapse microscopy | time-lapse microscopy & confocal z-stack imaging |
| Operetta high content screening microscopy/ PerkinElmer Life Sciences, UK                        | Xenon fiber-optic light source, 300 W, 360 – 640 nm continuous spectrum | 405: 360-400 & 410-480<br>488: 460-490 & 500-550<br>561: 560-580 & 590-640        | 20x or 40x air (0.45 NA and 0.95 NA) long WD*** | 14-bit Jenoptik CMOS                                       | -                                                                                    | high content screening microscopy                |
| Widefield Axiovert 200 /Zeiss, Germany                                                           | HBO100 mercury lamp                                                     | 488: 473-491 & 506-534<br>561: 550-580 & 590-650<br>640: 590-650 & 663-738        | oil immersion 63x Plan-Apochromat (1.4 NA)      | 12-bit AxioCam mRM                                         | -                                                                                    | molecular combing imaging                        |
| Amersham AI600 imager/GE Healthcare, Chicago, Il, USA                                            | UV transillumination light: 312 nm                                      | EtBr: 312 & 585-625                                                               | large aperture f/0.85 FUJINON™                  | 16-bit Peltier cooled Fujifilm Super CCD                   | -                                                                                    | EtBr stained gel & HRP stained blot imaging      |
| Typhoon FLA-9500/GE Healthcare, Chicago, Il, USA                                                 | 635 nm (red LD laser)                                                   | IP BP390                                                                          | -                                               | bi-alkali photomultiplier tubes (PMT), 16-bit digitization | -                                                                                    | radioactive gel imaging                          |
| Personal Molecular Imager™ System/ Biorad, Hercules, CA, USA                                     | 635 nm                                                                  | BP390                                                                             | -                                               | photomultiplier tubes (PMT), 16-bit digitization           | -                                                                                    | radioactive gel imaging                          |

\*ex.: excitation & em.: emission, \*\* dichroic specification, \*\*\* WD: working distance.

Supplementary Table 7: Plot statistics (main figures).

| Figure                  | Sample                 | n <sup>a</sup> | Median | Mean | StDev <sup>a</sup> | 95% CI <sup>a</sup> | p-value <sup>a</sup> |
|-------------------------|------------------------|----------------|--------|------|--------------------|---------------------|----------------------|
| 2A                      | Tet1CD 1               | 3318           | 0.93   | 1.04 | 0.51               | 1.04 - 1.06         | 5.02E-05             |
|                         | Tet1CD 2               | 1142           | 1.33   | 1.92 | 1.47               | 1.83 - 2.01         | < 2.2E-16            |
|                         | Tet1CD 3               | 128            | 2.61   | 3.21 | 1.3                | 2.98 - 3.44         | < 2.2E-16            |
|                         | mcherry 1              | 3292           | 1      | 1.1  | 0.54               | 1.08 - 1.12         | 0.652                |
|                         | mcherry 2              | 2809           | 1.04   | 1.28 | 0.97               | 1.24 - 1.32         | 0.06399              |
|                         | mcherry 3              | 295            | 0.98   | 1.17 | 0.99               | 1.06 - 1.28         | 0.6548               |
|                         | untransf.              | 4460           | 1      | 1.07 | 0.66               | 1.05 - 1.09         | -                    |
| 2B                      | dCTP 5mC               | 2710           | 1      | 1.19 | 0.35               | 0.98 - 1.1          | -                    |
|                         | d5mCTP 5mC             | 2274           | 3.3    | 3.13 | 0.41               | 2.98 - 3.01         | 0.045                |
|                         | dCTP 5hmC              | 2564           | 1      | 1.08 | 0.31               | 0.97 - 1.0          | -                    |
|                         | d5hmCTP 5hmC           | 2283           | 3.09   | 3.25 | 0.5                | 3.0 - 3.2           | 0.039                |
|                         | dCTP 5mC               | 2710           | 1      | 1.06 | 0.29               | 0.99 - 1.1          | -                    |
|                         | ddH <sub>2</sub> O 5mC | 2566           | 0.99   | 1.04 | 0.38               | 0.9 - 1.1           | 0.351                |
|                         | dCTP 5hmC              | 2564           | 1      | 0.98 | 0.48               | 0.99 - 1.12         | -                    |
| ddH <sub>2</sub> O 5hmC | 2081                   | 1.01           | 0.99   | 0.42 | 0.95 - 1           | 0.471               |                      |
| 2C                      | dCTP 5mC               | 1935           | 1      | 1.08 | 0.24               | 0.98 - 1.02         | -                    |
|                         | d5mCTP 5mC             | 2051           | 3.43   | 3.42 | 0.39               | 3.39 - 3.43         | 0.035                |
|                         | dCTP 5hmC              | 2146           | 1      | 1.2  | 0.21               | 1.01 - 1.21         | -                    |
|                         | d5hmCTP 5hmC           | 2314           | 3.17   | 3.09 | 0.41               | 3.3 - 3.41          | 0.014                |
| 3A                      | Tet1CD 1               | 300            | 1.47   | 1.47 | 0.05               | 1.47 - 1.48         | 3.3E-06              |
|                         | Tet1CD 2               | 1477           | 1.81   | 2.02 | 1.53               | 1.94 - 2.09         | < 2.2E-16            |
|                         | Tet1CD 3               | 809            | 1.96   | 2.28 | 1.4                | 2.18 - 2.38         | < 2.2E-16            |
|                         | mcherry 1              | 190            | 1      | 1.11 | 0.45               | 1.04 - 1.17         | -                    |
|                         | mcherry 2              | 3134           | 1.04   | 1.29 | 4.24               | 1.15 - 1.44         | 0.251                |
|                         | mcherry 3              | 253            | 1.08   | 1.39 | 1.39               | 1.33 - 1.44         | 0.0857               |
| 3B                      | dCTP 65°C              | 4783           | 1      | 1.08 | 0.52               | 1.07 - 1.1          | -                    |
|                         | d5mCTP 65°C            | 4443           | 0.74   | 0.94 | 0.7                | 0.92 - 0.96         | 0.000214             |
|                         | d5hmCTP 65°C           | 4401           | 1.18   | 1.24 | 0.4                | 1.23 - 1.26         | < 2.2E-16            |
|                         | dCTP 70°C              | 4329           | 1      | 1.11 | 0.72               | 1.09 - 1.13         | -                    |
|                         | d5mCTP 70°C            | 4140           | 0.62   | 0.96 | 1.32               | 0.92 - 1            | < 2.2E-16            |
|                         | d5hmCTP 70°C           | 3982           | 1.49   | 1.61 | 0.81               | 1.59 - 1.64         | < 2.2E-16            |
| 3C                      | W8 60°C                | 2827           | 1      | 1.08 | 0.32               | 1.07 - 1.09         | -                    |
|                         | W8 65°C                | 3150           | 1.52   | 1.33 | 0.66               | 1.31 - 1.35         | -                    |
|                         | W8 70°C                | 2846           | 2.23   | 3.06 | 1.8                | 2.99 - 3.13         | -                    |
|                         | PM 60°C                | 3102           | 2.57   | 3.06 | 1.72               | 1.08 - 1.1          | 8.70E-06             |
|                         | PM 65°C                | 4572           | 6.93   | 2.55 | 1.02               | 2.52 - 2.58         | < 2.2E-16            |
|                         | PM 70°C                | 4514           | 2.22   | 7.69 | 2.28               | 7.62 - 7.76         | < 2.2E-16            |
| 3D                      | wt 60°C                | 27             | 1      | 1.12 | 1.2                | 1.06 - 1.08         | -                    |
|                         | TKO 60°C               | 36             | 1.35   | 1.28 | 0.9                | 1.11 - 1.15         | 0.06524              |
|                         | wt 65°C                | 22             | 1.44   | 1.43 | 0.8                | 0.87 - 0.98         | -                    |
|                         | TKO 65°C               | 26             | 2.05   | 1.52 | 1.31               | 1.2 - 1.35          | 0.0000268            |
|                         | wt 70°C                | 23             | 1.55   | 2.08 | 1.4                | 1.26 - 1.47         | -                    |
|                         | TKO 70°C               | 22             | 2.59   | 2.19 | 1.25               | 1.24 - 1.31         | < 2.2E-16            |
| 4B                      | Tet1CD 25 min 1        | 2768           | 1.08   | 1.26 | 0.59               | 1.24 - 1.28         | < 2.2E-16            |
|                         | Tet1CD 25 min 2        | 1153           | 1.31   | 1.49 | 0.69               | 1.45 - 1.53         | < 2.2E-16            |
|                         | Tet1CD 25 min 3        | 293            | 1.34   | 1.51 | 0.66               | 1.43 - 1.58         | < 2.2E-16            |
|                         | mcherry 25 min 1       | 2283           | 1      | 1.09 | 0.38               | 1.07 - 1.1          | -                    |
|                         | mcherry 25 min 2       | 3687           | 1.06   | 1.19 | 0.53               | 1.17 - 1.21         | 0.354                |
|                         | mcherry 25 min 3       | 1500           | 1.08   | 1.24 | 0.8                | 1.2 - 1.28          | 0.0215               |
|                         | Tet1CD 45 min 1        | 2680           | 1.47   | 1.68 | 0.75               | 1.65 - 1.7          | < 2.2E-16            |
|                         | Tet1CD 45 min 2        | 751            | 1.73   | 1.99 | 1.09               | 1.91 - 2.06         | < 2.2E-16            |
|                         | Tet1CD 45 min 3        | 147            | 1.68   | 1.95 | 0.86               | 1.81 - 2.09         | 1.32E-8              |
|                         | mcherry 45 min 1       | 2553           | 1.39   | 1.52 | 0.62               | 1.5 - 1.54          | -                    |
|                         | mcherry 45 min 2       | 2784           | 1.5    | 1.7  | 0.89               | 1.67 - 1.74         | 5.20E-09             |
|                         | mcherry 45 min 3       | 1314           | 1.54   | 1.73 | 0.84               | 1.71 - 1.8          | 0.0479               |
|                         | Tet1CD 60 min 1        | 2293           | 1.8    | 1.75 | 1.33               | 2.02 - 2.1          | 3.05E-11             |
|                         | Tet1CD 60 min 2        | 1343           | 2.24   | 2.06 | 1.68               | 2.49 - 2.64         | < 2.2E-16            |
|                         | Tet1CD 60 min 3        | 257            | 2.24   | 2.62 | 0.75               | 2.472 - 2.83        | 9.79E-10             |
|                         | mcherry 60 min 1       | 2835           | 1.8    | 1.96 | 0.86               | 1.93 - 1.99         | -                    |
|                         | mcherry 60 min 2       | 2795           | 1.94   | 2.14 | 0.87               | 2.11 - 2.18         | 0.145                |
|                         | mcherry 60 min 3       | 1635           | 1.96   | 2.17 | 0.85               | 2.13 - 2.21         | 0.0568               |

| Figure           | Sample                   | n <sup>a</sup> | Median | Mean  | StDev <sup>a</sup> | 95% CI <sup>a</sup> | p-value <sup>a</sup> |
|------------------|--------------------------|----------------|--------|-------|--------------------|---------------------|----------------------|
|                  | Tet1CD 120 min 1         | 2007           | 2.59   | 2.93  | 1.43               | 2.87 - 2.99         | < 2.2E-16            |
|                  | Tet1CD 120 min 2         | 1540           | 3.14   | 3.42  | 1.51               | 3.35 - 3.49         | < 2.2E-16            |
|                  | Tet1CD 120 min 3         | 348            | 3.15   | 3.41  | 1.52               | 3.25 - 3.57         | < 2.2E-16            |
|                  | mcherry 120 min 1        | 2527           | 2.35   | 2.58  | 1.02               | 2.54 - 2.62         | -                    |
|                  | mcherry 120 min 2        | 2974           | 2.57   | 2.82  | 1.14               | 2.78 - 2.86         | 0.00743              |
|                  | mcherry 120 min 3        | 1682           | 2.56   | 2.85  | 1.15               | 2.79 - 2.9          | 0.000485             |
|                  | 4C                       | dCTP           | 3804   | 1     | 1.05               | 0.84                | 1.02 - 1.18          |
| d5mCTP           |                          | 2864           | 0.41   | 0.39  | 0.99               | 0.35 - 0.48         | 0.0032               |
| dCTP             |                          | 8619           | 1      | 1.2   | 0.54               | 0.9 - 1.31          | -                    |
| d5hmCTP          |                          | 9835           | 2.73   | 2.83  | 1.12               | 2.54 - 292          | 0.00042              |
| 5A <sup>b</sup>  | dC 0 U                   | 2              | -      | 1     | -                  | -                   | -                    |
|                  | dC 1 U                   | 2              | -      | 1.36  | -                  | -                   | -                    |
|                  | d5mC 0 U                 | 2              | -      | 1     | -                  | -                   | -                    |
|                  | d5mC 1 U                 | 2              | -      | 1.18  | -                  | -                   | 0.00195              |
|                  | d5hmC 0 U                | 2              | -      | 1     | -                  | -                   | -                    |
|                  | d5hmC 1 U                | 2              | -      | 0.95  | -                  | -                   | 0.16                 |
| 5B               | Tet1CD 10 min 1          | 4125           | 1.26   | 1.47  | 0.71               | 1.45 - 1.49         | < 2.2E-16            |
|                  | Tet1CD 10 min 2          | 808            | 1.5    | 1.81  | 1.25               | 1.72 - 1.9          | < 2.2E-16            |
|                  | Tet1CD 10 min 3          | 650            | 1.64   | 1.97  | 1.21               | 1.88 - 2.06         | 3.82E-06             |
|                  | mcherry 10 min 1         | 1950           | 1      | 1.21  | 0.58               | 1.18 - 1.24         | -                    |
|                  | mcherry 10 min 2         | 798            | 1.21   | 1.48  | 0.8                | 1.42 - 1.53         | 0.022                |
|                  | mcherry 10 min 3         | 127            | 1.15   | 1.4   | 0.7                | 1.28 - 1.52         | 0.323                |
|                  | Tet1CD 20 min 1          | 1258           | 2.27   | 2.46  | 1.25               | 2.39 - 2.53         | < 2.2E-16            |
|                  | Tet1CD 20 min 2          | 1444           | 2.4    | 2.75  | 1.62               | 2.67 - 2.83         | < 2.2E-16            |
|                  | Tet1CD 20 min 3          | 184            | 2.25   | 2.45  | 1.37               | 2.25 - 2.65         | 0.002118             |
|                  | mcherry 20 min 1         | 948            | 1.95   | 2.13  | 1.09               | 2.06 - 2.2          | -                    |
|                  | mcherry 20 min 2         | 441            | 1.94   | 2.41  | 1.49               | 2.27 - 2.55         | 0.0004385            |
|                  | mcherry 20 min 3         | 850            | 1.98   | 2.33  | 1.25               | 2.25 - 2.41         | 0.1832               |
|                  | Tet1CD 30 min 1          | 1308           | 3.61   | 3.77  | 1.96               | 3.66 - 3.88         | < 2.2E-16            |
|                  | Tet1CD 30 min 2          | 1479           | 3.65   | 3.86  | 2.31               | 3.74 - 3.98         | 2.65E-15             |
|                  | Tet1CD 30 min 3          | 155            | 3.58   | 3.81  | 2.36               | 3.44 - 4.18         | 0.0004385            |
|                  | mcherry 30 min 1         | 1216           | 3.32   | 3.35  | 2.01               | 3.24 - 3.46         | -                    |
| mcherry 30 min 2 | 3657                     | 3.47           | 3.98   | 2.75  | 3.89 - 4.07        | 0.0236              |                      |
| mcherry 30 min 3 | 578                      | 3.55           | 4.08   | 2.92  | 3.84 - 4.32        | 5.32E-09            |                      |
| 5C               | dCTP                     | 8285           | 1      | 1.05  | 0.18               | 0.98 - 1.1          | -                    |
|                  | d5mCTP                   | 4861           | 0.45   | 0.38  | 0.36               | 0.35 - 0.48         | 0.024                |
|                  | dCTP                     | 9921           | 1      | 1.1   | 0.25               | 1 - 1.02            | -                    |
|                  | d5hmCTP                  | 4727           | 1.37   | 1.42  | 0.56               | 1.35 - 1.59         | 0.039                |
| 5D <sup>b</sup>  | dC 0 U                   | 2              | -      | 1     | -                  | -                   | -                    |
|                  | dC 1 U                   | 2              | -      | 0.182 | -                  | -                   | -                    |
|                  | d5mC 0 U                 | 2              | -      | 1     | -                  | -                   | -                    |
|                  | d5mC 1 U                 | 2              | -      | 0.65  | -                  | -                   | 0.315                |
|                  | d5hmC 0 U                | 2              | -      | 1     | -                  | -                   | -                    |
|                  | d5hmC 1 U                | 2              | -      | 0.08  | -                  | -                   | 0.902                |
| 6B               | Tet1CD late 30 min       | 18             | -      | 2.45  | 0.29               | -                   | -                    |
|                  | mcherry late 30 min      | 18             | -      | 2.02  | 0.12               | -                   | 0.0478               |
|                  | Tet1CD early/mid 30 min  | 5              | -      | 1.51  | 0.1                | -                   | -                    |
|                  | mcherry early/mid 30 min | 7              | -      | 1.32  | 0.07               | -                   | 0.0143               |
|                  | Tet1CD DMSO 30 min       | 21             | -      | 1.06  | 0.04               | -                   | -                    |
|                  | mcherry DMSO 30 min      | 18             | -      | 0.99  | 0.05               | -                   | 0.173                |
| 6C               | J1 wt DMSO               | 13             | -      | 0.98  | 0.02               | -                   | -                    |
|                  | J1 TKO DMSO              | 11             | -      | 1.03  | 0.03               | -                   | 0.25                 |
|                  | J1 wt Aph                | 17             | -      | 1.25  | 0.12               | -                   | -                    |
|                  | J1 TKO Aph               | 20             | -      | 1.61  | 0.21               | -                   | 0.0136               |
| 7A               | J1 wt                    | 1512           | -      | 0.74  | 0.02               | -                   | -                    |
|                  | J1 TKO                   | 1647           | -      | 0.72  | 0.02               | -                   | 0.356                |
| 7C <sup>c</sup>  | Stage I wt               | 368            | -      | 0.25  | 0.05               | -                   | -                    |
|                  | Stage II wt              | 458            | -      | 0.31  | 0.07               | -                   | -                    |
|                  | Stage III wt             | 239            | -      | 0.15  | 0.04               | -                   | -                    |
|                  | Stage Y wt               | 91             | -      | 0.06  | 0.02               | -                   | -                    |
|                  | Mitosis wt               | 35             | -      | 0.02  | 0.01               | -                   | -                    |



| Figure | Sample        | n <sup>a</sup> | Median | Mean | StDev <sup>a</sup> | 95% CI <sup>a</sup> | p-value <sup>a</sup> |
|--------|---------------|----------------|--------|------|--------------------|---------------------|----------------------|
|        | Non-S wt      | 321            | -      | 0.21 | 0.08               | -                   | -                    |
|        | Stage I TKO   | 484            | -      | 0.29 | 0.04               | -                   | 0.6502               |
|        | Stage II TKO  | 365            | -      | 0.22 | 0.05               | -                   | 0.0126               |
|        | Stage III TKO | 326            | -      | 0.17 | 0.05               | -                   | 0.6521               |
|        | Stage Y TKO   | 90             | -      | 0.05 | 0.02               | -                   | 0.8322               |
|        | Mitosis TKO   | 30             | -      | 0.02 | 0.01               | -                   | 0.7161               |
|        | Non-S TKO     | 379            | -      | 0.23 | 0.04               | -                   | 0.9102               |
| 7D     | J1 wt         | 731            | 1.59   | 1.67 | 0.57               | 0.38 – 0.84         | -                    |
|        | J1 TKO        | 641            | 1.75   | 1.86 | 0.67               | 0.56 – 1.42         | 0.000268             |

<sup>a</sup> n: number of cells of all replicates (if not stated otherwise), StDev: standard deviation, 95% CI: 95% confidence interval, p-value: calculated as stated in figure legends and material and methods section.

<sup>b</sup> n numbers refer to independent PCRs analyzed and p-value is calculated against the band intensities of the dC containing experiment.

<sup>c</sup> p-values are calculated for wt versus TKO in every stage.

Supplementary Table 8: Plot statistics (supplementary figures).

| Figure           | Sample         | n <sup>a</sup> | Median | Mean  | StDev <sup>a</sup> | 95% CI <sup>a</sup> | p-value <sup>a</sup> |
|------------------|----------------|----------------|--------|-------|--------------------|---------------------|----------------------|
| S8C <sup>b</sup> | dC             | 2              | -      | 1     | 0.05               | 0.55 - 1.45         | -                    |
|                  | d5mC           | 2              | -      | 0.46  | 0.14               | -0.8 - 1.72         | 0.02641              |
|                  | d5hmC          | 2              | -      | 1.35  | 0.37               | -1.97 - 4.67        | 0.03969              |
| S8E <sup>b</sup> | dC             | 3              | -      | 87.93 | 0.74               | 86.09 - 89.77       | -                    |
|                  | d5mC           | 3              | -      | 93.72 | 0.25               | 93.1 - 94.34        | 0.0014               |
|                  | d5hmC          | 3              | -      | 86.56 | 0.26               | 85.91 - 87.21       | 0.046                |
|                  | d5fC           | 3              | -      | 83.75 | 0.18               | 83.3 - 84.2         | 0.03121              |
|                  | d5caC          | 3              | -      | 85.4  | 0.95               | 83.04 - 87.76       | 0.423                |
| S8F <sup>b</sup> | dC             | 3              | -      | 85.7  | 0.68               | 83.86 - 87.54       | -                    |
|                  | d5mC           | 3              | -      | 89.95 | 0.78               | 89.33 - 90.57       | 0.003652             |
|                  | d5hmC          | 3              | -      | 83.44 | 0.9                | 82.79 - 84.09       | 0.04702              |
|                  | d5fC           | 3              | -      | 82.62 | 0.55               | 82.17 - 83.07       | 0.003151             |
|                  | d5caC          | 3              | -      | 83.22 | 0.72               | 80.86 - 85.58       | 0.02314              |
| S10A             | 60°C           | 114            | 1      | 1.33  | 0.61               | 1.22 - 1.44         | -                    |
|                  | 70°C           | 113            | 4.81   | 4.89  | 0.77               | 4.75 - 5.03         | 8.24E-07             |
|                  | 80°C           | 121            | 6.1    | 5.98  | 2.33               | 5.56 - 6.4          | 0.001492             |
| S10B up          | Tet1CD 65°C 1  | 545            | 2.15   | 2.3   | 0.65               | 2.24 - 2.35         | < 2.2E-16            |
|                  | Tet1CD 65°C 2  | 2601           | 2.54   | 2.88  | 1.3                | 2.83 - 2.93         | < 2.2E-16            |
|                  | Tet1CD 65°C 3  | 732            | 2.72   | 3.17  | 1.76               | 3.04 - 3.3          | < 2.2E-16            |
|                  | mcherry 65°C 1 | 353            | 1      | 1.09  | 0.6                | 1.02 - 1.15         | -                    |
|                  | mcherry 65°C 2 | 3080           | 1.08   | 1.23  | 0.68               | 1.2 - 1.25          | 0.417                |
|                  | mcherry 65°C 3 | 2145           | 1.16   | 1.38  | 1.42               | 1.32 - 1.44         | 0.415                |
|                  | Tet1CD 70°C 1  | 520            | 2.56   | 2.73  | 0.8                | 2.66 - 2.8          | < 2.2E-16            |
|                  | Tet1CD 70°C 2  | 2622           | 2.92   | 3.29  | 1.64               | 3.23 - 3.35         | < 2.2E-16            |
|                  | Tet1CD 70°C 3  | 693            | 3.11   | 3.65  | 2.32               | 3.48 - 3.83         | < 2.2E-16            |
|                  | mcherry 70°C 1 | 1615           | 1.42   | 1.53  | 1.02               | 1.48 - 1.58         | -                    |
|                  | mcherry 70°C 2 | 2924           | 1.52   | 1.77  | 2.32               | 1.69 - 1.85         | 0.1144               |
|                  | mcherry 70°C 3 | 2770           | 1.61   | 1.87  | 2.15               | 1.79 - 1.95         | 0.0334               |
| S10B down        | Tet1CD 60°C 1  | 1002           | 1.68   | 2.01  | 1.05               | 1.94 - 2.08         | < 2.2E-16            |
|                  | Tet1CD 60°C 2  | 1189           | 1.69   | 1.92  | 1.62               | 1.83 - 2.01         | < 2.2E-16            |
|                  | Tet1CD 60°C 3  | 3347           | 1.75   | 2.72  | 2.16               | 2.65 - 2.79         | < 2.2E-16            |
|                  | mcherry 60°C 1 | 1043           | 1      | 1.19  | 0.63               | 1.15 - 1.23         | -                    |
|                  | mcherry 60°C 2 | 2197           | 0.97   | 1.29  | 1.75               | 1.22 - 1.36         | 0.708                |
|                  | mcherry 60°C 3 | 4203           | 1.06   | 1.4   | 1.99               | 1.34 - 1.46         | 0.2168               |
|                  | Tet1CD 65°C 1  | 2190           | 2.31   | 2.21  | 0.82               | 2.18 - 2.24         | < 2.2E-16            |
|                  | Tet1CD 65°C 2  | 2664           | 2.15   | 2.44  | 1.1                | 2.4 - 2.48          | < 2.2E-16            |
|                  | Tet1CD 65°C 3  | 3709           | 2.65   | 3.9   | 2.9                | 3.81 - 3.99         | < 2.2E-16            |
|                  | mcherry 65°C 1 | 1010           | 1.02   | 1.11  | 0.65               | 1.07 - 1.15         | -                    |
|                  | mcherry 65°C 2 | 2428           | 1.04   | 1.08  | 0.79               | 1.05 - 1.11         | 0.4578               |
|                  | mcherry 65°C 3 | 3104           | 1.01   | 1.28  | 0.97               | 1.25 - 1.31         | 0.05469              |
| S10C             | Tet1CD 1       | 3318           | 0.48   | 0.41  | 0.14               | 0.41 - 0.42         | < 2.2E-16            |
|                  | Tet1CD 2       | 1142           | 0.5    | 0.45  | 0.17               | 0.44 - 0.46         | < 2.2E-16            |
|                  | Tet1CD 3       | 128            | 0.51   | 0.46  | 0.16               | 0.43 - 0.49         | < 2.2E-16            |
|                  | mcherry 1      | 3292           | 0.94   | 0.98  | 0.25               | 0.97 - 0.99         | 0.857                |
|                  | mcherry 2      | 2809           | 0.97   | 1.04  | 0.35               | 1.03 - 1.05         | 0.7245               |
|                  | mcherry 3      | 295            | 0.98   | 1.09  | 0.39               | 1.05 - 1.13         | 0.685                |
|                  | untransf.      | 4460           | 1      | 1.03  | 0.33               | 1.02 - 1.04         | -                    |
| S10D             | acet. +TSA     | 2806           | 13.68  | 3.28  | 1.95               | 3.21 - 3.35         | < 2.2E-16            |
|                  | acet. -TSA     | 2714           | 1      | 1.05  | 0.56               | 1.03 - 1.07         | -                    |
|                  | decond. +TSA   | 1342           | 0.39   | 0.42  | 0.32               | 0.4 - 0.44          | < 2.2E-16            |
|                  | decond. -TSA   | 2262           | 1      | 1.34  | 0.56               | 1.32 - 1.36         | -                    |
|                  | 5hmC +TSA      | 1342           | 1.01   | 1.06  | 0.87               | 1.01 - 1.11         | 0.5034               |
|                  | 5hmC -TSA      | 2262           | 1      | 1.03  | 0.63               | 1 - 1.06            | -                    |
|                  | 60°C +TSA      | 2540           | 0.96   | 1.32  | 0.54               | 1.3 - 1.34          | 0.554                |
|                  | 60°C -TSA      | 2351           | 1      | 1.56  | 0.36               | 1.55 - 1.57         | -                    |
|                  | 65°C +TSA      | 1956           | 1.12   | 1.23  | 0.98               | 1.19 - 1.27         | 0.079                |
|                  | 65°C -TSA      | 3976           | 1      | 1.54  | 1.02               | 1.51 - 1.57         | -                    |
|                  | 70°C +TSA      | 1845           | 1.04   | 1.52  | 0.98               | 1.48 - 1.56         | 0.208                |
|                  | 70°C -TSA      | 2630           | 1      | 1.21  | 0.65               | 1.19 - 1.23         | -                    |
| S11A             | Tet1CD 1       | 1595           | 1.24   | 1.26  | 1.4                | 1.19 - 1.33         | 0.01553              |

| Figure            | Sample           | n <sup>a</sup> | Median | Mean | StDev <sup>a</sup> | 95% CI <sup>a</sup> | p-value <sup>a</sup> |
|-------------------|------------------|----------------|--------|------|--------------------|---------------------|----------------------|
|                   | Tet1CD 2         | 1326           | 1.94   | 2.47 | 1.98               | 2.36 - 2.58         | 1.14E-06             |
|                   | Tet1CD 3         | 1550           | 3.54   | 4.47 | 1.6                | 4.39 - 4.55         | 1.03E-08             |
|                   | mcherry 1        | 3688           | 1.26   | 1.44 | 0.8                | 1.41 - 1.47         | 0.221                |
|                   | mcherry 2        | 1902           | 1.14   | 1.91 | 1.92               | 1.82 - 2            | 0.6627               |
|                   | mcherry 3        | 1610           | 1.18   | 1.9  | 0.78               | 1.86 - 1.94         | 0.83                 |
|                   | untransf.        | 1950           | 1      | 1.22 | 1.1                | 1.17 - 1.27         | -                    |
|                   | S11B             | 60°C           | 129    | 1    | 1                  | 0.01                | 0.99 - 1             |
|                   | 65°C             | 123            | 1.02   | 1.02 | 0.01               | 1.02 - 1.02         | 1.05E-07             |
|                   | 70°C             | 115            | 1.05   | 1.06 | 0.03               | 1.05 - 1.07         | 1.13E-11             |
|                   | 75°C             | 118            | 1.63   | 1.67 | 0.26               | 1.62 - 1.72         | 5.04E-10             |
|                   | 80°C             | 128            | 3.26   | 3.56 | 1.35               | 3.32 - 3.8          | 6.89E-11             |
| S11C              | Tet1CD 65°C      | 1116           | 1.38   | 1.32 | 0.03               | 1.31 - 1.32         | 2.74E-10             |
|                   | mcherry 65°C     | 2168           | 1      | 1    | 0.01               | 0.99 - 1            | -                    |
|                   | Tet1CD 70°C      | 1218           | 1.51   | 1.39 | 0.05               | 1.38 - 1.39         | 5.35E-07             |
|                   | mcherry 70°C     | 2034           | 1.1    | 1.03 | 0.01               | 1.02 - 1.03         | -                    |
|                   | Tet1CD 75°C      | 1326           | 2.32   | 2.33 | 0.14               | 2.32 - 2.33         | 8.84E-06             |
|                   | mcherry 75°C     | 1929           | 1.36   | 1.19 | 0.12               | 1.18 - 1.19         | -                    |
|                   | Tet1CD 80°C      | 2105           | 2.62   | 2.38 | 0.43               | 2.36 - 2.4          | 0.005725             |
|                   | mcherry 80°C     | 2251           | 2.48   | 2.4  | 0.16               | 2.39 - 2.41         | -                    |
| S12B              | Tet1CD 60 min 1  | 2293           | 1.03   | 1.15 | 0.53               | 1.13 - 1.17         | < 2.2E-16            |
|                   | Tet1CD 60 min 2  | 1343           | 1.26   | 1.4  | 0.69               | 1.36 - 1.44         | < 2.2E-16            |
|                   | Tet1CD 60 min 3  | 257            | 1.26   | 1.45 | 0.87               | 1.34 - 1.55         | 9.58E-11             |
|                   | mcherry 60 min 1 | 2835           | 1      | 1.08 | 0.4                | 1.06 - 1.09         | -                    |
|                   | mcgerry60 min 2  | 2795           | 1.08   | 1.17 | 0.46               | 1.16 - 1.19         | 0.0975               |
|                   | mcherry 60 min 3 | 1635           | 1.09   | 1.18 | 0.44               | 1.16 - 1.2          | 0.847                |
| S13A <sup>c</sup> | dC 30 sec        | 12             | 0.08   | 0.1  | 0.02               | 0.04 - 0.05         | -                    |
|                   | dC 60 sec        | 12             | 0.14   | 0.22 | 0.05               | 0.12 - 0.13         | -                    |
|                   | dC 90 sec        | 12             | 0.25   | 0.35 | 0.05               | 0.24 - 0.25         | -                    |
|                   | dC 120 sec       | 12             | 0.4    | 0.47 | 0.05               | 0.38 - 0.4          | -                    |
|                   | dC 600 sec       | 12             | 1      | 1    | 0                  | 0.9 - 1.0           | -                    |
|                   | d5mC 30 sec      | 12             | 0.06   | 0.05 | 0.02               | 0.05 - 0.06         | n.s.                 |
|                   | d5mC 60 sec      | 12             | 0.11   | 0.12 | 0.03               | 0.10 - 0.12         | n.s.                 |
|                   | d5mC 90 sec      | 12             | 0.22   | 0.23 | 0.03               | 0.21 - 0.22         | n.s.                 |
|                   | d5mC 120 sec     | 12             | 0.37   | 0.34 | 0.04               | 0.36 - 0.38         | n.s.                 |
|                   | d5mC 600 sec     | 12             | 0.87   | 0.81 | 0.08               | 0.8 - 0.82          | n.s.                 |
|                   | d5hmC 30 sec     | 12             | 0.06   | 0.03 | 0.03               | 0.06 - 0.07         | n.s.                 |
|                   | d5hmC 60 sec     | 12             | 0.15   | 0.14 | 0.02               | 0.14 - 0.15         | n.s.                 |
|                   | d5hmC 90 sec     | 12             | 0.28   | 0.27 | 0.03               | 0.27 - 0.29         | n.s.                 |
|                   | d5hmC 120 sec    | 12             | 0.41   | 0.39 | 0.04               | 0.41 - 0.42         | n.s.                 |
|                   | d5hmC 600 sec    | 12             | 0.97   | 0.92 | 0.08               | 0.96 - 0.98         | n.s.                 |
| S13B              | Tet1CD 1a        | 5768           | 1.08   | 1.26 | 0.59               | 1.2 - 1.22          | < 2.2E-16            |
|                   | Tet1CD 1b        | 1153           | 1.31   | 1.49 | 0.68               | 1.24 - 1.31         | < 2.2E-16            |
|                   | Tet1CD 1c        | 293            | 1.34   | 1.51 | 0.66               | 1.1 - 1.2           | < 2.2E-16            |
|                   | Tet1CD 2         | 159            | 1.38   | 1.49 | 0.69               | 1.01 - 1.2          | 5.59E-12             |
|                   | Tet1CD 3         | 92             | 1.12   | 1.27 | 0.55               | 0.93 - 1.21         | 0.0017               |
|                   | Tet1CD 4         | 213            | 1.1    | 1.25 | 0.6                | 0.81 - 0.94         | 0.00011              |
|                   | mcherry 1a       | 9283           | 1      | 1.09 | 0.38               | 1.04 - 1.06         | -                    |
|                   | mcherry 1b       | 4687           | 1.06   | 1.19 | 0.53               | 1.03 - 1.06         | 0.89                 |
|                   | mcherry 1c       | 1500           | 1.07   | 1.24 | 0.8                | 1.09 - 1.15         | 0.65                 |
|                   | mcherry 2        | 1020           | 1.14   | 1.32 | 1.23               | 1.02 - 1.08         | 0.056                |
|                   | mcherry 3        | 315            | 1.07   | 1.17 | 1.06               | 1.04 - 1.22         | 0.36                 |
|                   | mcherry 4        | 409            | 1.08   | 1.21 | 1.28               | 0.9 - 1.01          | 0.078                |
| S14A <sup>b</sup> | dC 0 U           | 2              | -      | 1    | -                  | -                   | -                    |
|                   | dC 2 U           | 2              | -      | 1.49 | -                  | -                   | -                    |
|                   | d5mC 0 U         | 2              | -      | 1    | -                  | -                   | -                    |
|                   | d5mC 2 U         | 2              | -      | 0.9  | -                  | -                   | 0.0121               |
|                   | d5hmC 0 U        | 2              | -      | 1    | -                  | -                   | -                    |
|                   | d5hmC 2 U        | 2              | -      | 1.38 | -                  | -                   | 0.85                 |
| S14B              | Tet1CD 10 min 1  | 4125           | 1.26   | 1.32 | 0.65               | 1.3 - 1.34          | < 2.2E-16            |
|                   | Tet1CD 10 min 2  | 808            | 1.46   | 1.67 | 0.98               | 1.6 - 1.74          | < 2.2E-16            |
|                   | Tet1CD 10 min 3  | 650            | 1.52   | 1.83 | 0.87               | 1.76 - 1.9          | 3.52E-06             |

| Figure | Sample                       | n <sup>a</sup> | Median | Mean  | StDev <sup>a</sup> | 95% CI <sup>a</sup> | p-value <sup>a</sup> |
|--------|------------------------------|----------------|--------|-------|--------------------|---------------------|----------------------|
|        | mcherry 10 min 1             | 1950           | 1      | 1.01  | 0.97               | 0.97-1.05           | -                    |
|        | mcherry 10 min 2             | 798            | 1.21   | 1.08  | 1.01               | 1.01 - 1.15         | 0.022                |
|        | mcherry 10 min 3             | 127            | 1.15   | 1.08  | 0.89               | 0.92 - 1.24         | 0.323                |
|        | Tet1CD 20 min 1              | 1258           | 1.97   | 2.32  | 1.04               | 2.26 - 2.38         | < 2.2E-16            |
|        | Tet1CD 20 min 2              | 1444           | 2.02   | 2.1   | 1.02               | 2.05 - 2.15         | < 2.2E-16            |
|        | Tet1CD 20 min 3              | 184            | 2.01   | 2.08  | 0.98               | 1.94 - 2.22         | 0.002748             |
|        | mcherry 20 min 1             | 948            | 1.87   | 2.03  | 1.02               | 1.96 - 2.1          | -                    |
|        | mcherry 20 min 2             | 441            | 1.98   | 2.1   | 1.12               | 2 - 2.2             | 0.0397               |
|        | mcherry 20 min 3             | 850            | 1.88   | 1.99  | 0.99               | 1.92 - 2.06         | 0.1531               |
|        | Tet1CD 30 min 1              | 1308           | 3.01   | 3.42  | 1.85               | 3.32 - 3.52         | < 2.2E-16            |
|        | Tet1CD 30 min 2              | 1479           | 3.02   | 3.28  | 1.68               | 3.19 - 3.37         | 8.47E-16             |
|        | Tet1CD 30 min 3              | 155            | 3      | 3.18  | 1.45               | 2.95 - 3.41         | 0.01529              |
|        | mcherry 30 min 1             | 1216           | 2.85   | 3.08  | 1.04               | 3.02 - 3.14         | -                    |
|        | mcherry 30 min 2             | 3657           | 2.95   | 3.13  | 1.04               | 3.1 - 3.16          | 0.022                |
|        | mcherry 30 min 3             | 578            | 2.98   | 3.37  | 1.11               | 3.28 - 3.46         | 0.03161              |
| S15A   | dC                           | 2              | -      | 1     | -                  | -                   | -                    |
|        | 12.5% d5hmC                  | 2              | -      | 0.92  | -                  | -                   | -                    |
|        | 50% d5hmC                    | 2              | -      | 0.81  | -                  | -                   | -                    |
|        | 100% d5hmC                   | 2              | -      | 0.41  | -                  | -                   | -                    |
|        | 12.5% d5mC                   | 2              | -      | 0.47  | -                  | -                   | -                    |
|        | 50% d5mC                     | 2              | -      | 0.38  | -                  | -                   | -                    |
|        | 100% d5mC                    | 2              | -      | 0.32  | -                  | -                   | -                    |
| S15B   | Tet1CD 1a                    | 1258           | 1.17   | 1.21  | 0.55               | 1.99 - 1.23         | < 2.2E-16            |
|        | Tet1CD 1b                    | 1444           | 1.18   | 1.28  | 0.69               | 1.24 - 1.31         | < 2.2E-16            |
|        | Tet1CD 1c                    | 184            | 1.11   | 1.48  | 0.59               | 1.06 - 1.24         | 0.0405               |
|        | Tet1CD 2                     | 93             | 1.1    | 1.1   | 0.6                | 0.98 - 1.22         | 0.458                |
|        | Tet1CD 3                     | 38             | 0.92   | 1.1   | 0.67               | 0.85 - 1.29         | 0.879                |
|        | Tet1CD 4                     | 67             | 0.77   | 0.88  | 0.47               | 0.76 - 0.99         | 0.0047               |
|        | mcherry 1a                   | 948            | 1      | 1.05  | 0.53               | 1.02 - 1.09         | -                    |
|        | mcherry 1b                   | 441            | 0.97   | 1.05  | 0.57               | 0.99 - 1.1          | 0.847                |
|        | mcherry 1c                   | 850            | 0.99   | 1.12  | 0.63               | 0.98 - 1.26         | 0.38                 |
|        | mcherry 2                    | 58             | 0.99   | 1.05  | 0.48               | 0.93 - 1.18         | 0.96                 |
|        | mcherry 3                    | 31             | 1.05   | 1.13  | 0.77               | 0.85 - 1.41         | 0.589                |
|        | mcherry 4                    | 44             | 0.94   | 0.96  | 0.55               | 0.79 - 1.12         | 0.087                |
| S16B   | Tet1CD                       | 35             | 0.98   | 0.98  | 0.03               | 0.97 - 0.99         | 0.341                |
|        | mcherry                      | 31             | 1      | 0.99  | 0.06               | 0.97 - 1.01         | -                    |
| S16C   | Tet1CD 30 min                | 31             | -      | 1.8   | 0.13               | -                   | -                    |
|        | mcherry 30 min               | 29             | -      | 1.52  | 0.08               | -                   | 0.0489               |
|        | Tet1CD 12 min                | 35             | -      | 1.33  | 0.09               | -                   | -                    |
|        | mcherry 12 min               | 30             | -      | 1.16  | 0.08               | -                   | < 2.2E-16            |
| S16E   | MEF Tet1CD 30 min            | 11             | -      | 1.71  | 0.09               | -                   | -                    |
|        | MEF mcherry 30 min           | 19             | -      | 1.45  | 0.07               | -                   | 0.048                |
|        | MEF Tet1CD DMSO 30 min       | 14             | -      | 1.11  | 0.02               | -                   | -                    |
|        | MEF mcherry DMSO 30 min      | 10             | -      | 1.12  | 0.02               | -                   | 0.0873               |
| S17A   | Tet1CD                       | 21             | 0.78   | 0.81  | 0.1                | 0.73 - 0.84         | -                    |
|        | mcherry                      | 18             | 0.25   | 0.23  | 0.08               | 0.2 - 0.3           | 2.76E-11             |
| S18C   | MEF W8 30 min                | 26             | -      | 2.38  | 0.13               | -                   | 0.0144               |
|        | MEF PM 30 min                | 34             | -      | 2.09  | 0.12               | -                   | -                    |
|        | MEF W8 DMSO 30 min           | 31             | -      | 1.17  | 0.02               | -                   | 0.433                |
|        | MEF PM DMSO 30 min           | 31             | -      | 1.13  | 0.04               | -                   | -                    |
| S20A   | Nuclear H3K9ac J1 wt         | 29             | -      | 52.38 | 8.29               | -                   | -                    |
|        | Nuclear H3K9ac J1 TKO        | 34             | -      | 47.21 | 3.21               | -                   | 0.92                 |
|        | Chromocentric H3K9ac J1 wt   | 29             | -      | 41.42 | 3.3                | -                   | -                    |
|        | Chromocentric H3K9ac J1 TKO  | 34             | -      | 47.9  | 8.57               | -                   | 0.47                 |
|        | Nuclear H3K18ac J1 wt        | 31             | -      | 52.62 | 9.79               | -                   | -                    |
|        | Nuclear H3K18ac J1 TKO       | 20             | -      | 51.1  | 10.2               | -                   | 0.505                |
|        | Chromocentric H3K18ac J1 wt  | 31             | -      | 47.8  | 2.4                | -                   | -                    |
|        | Chromocentric H3K18ac J1 TKO | 20             | -      | 51.8  | 4.35               | -                   | 0.384                |
|        | Nuclear H3K27ac J1 wt        | 47             | -      | 37.03 | 5.71               | -                   | -                    |
|        | Nuclear H3K27ac J1 TKO       | 23             | -      | 54.3  | 5.04               | -                   | 0.0967               |

| Figure | Sample                       | n <sup>a</sup> | Median | Mean  | StDev <sup>a</sup> | 95% CI <sup>a</sup> | p-value <sup>a</sup> |
|--------|------------------------------|----------------|--------|-------|--------------------|---------------------|----------------------|
|        | Chromocentric H3K27ac J1 wt  | 47             | -      | 38.52 | 3.6                | -                   | -                    |
|        | Chromocentric H3K27ac J1 TKO | 23             | -      | 49.02 | 6.8                | -                   | 0.073                |
|        | Nuclear H3K56ac J1 wt        | 33             | -      | 83.58 | 9.18               | -                   | -                    |
|        | Nuclear H3K56ac J1 TKO       | 21             | -      | 87.87 | 1.67               | -                   | 0.97                 |
|        | Chromocentric H3K56ac J1 wt  | 33             | -      | 85.73 | 13.39              | -                   | -                    |
|        | Chromocentric H3K56ac J1 TKO | 21             | -      | 83.01 | 14.25              | -                   | 0.835                |
|        | Nuclear H4K8ac J1 wt         | 28             | -      | 48.66 | 12.14              | -                   | -                    |
|        | Nuclear H4K8ac J1 TKO        | 22             | -      | 52.25 | 8.93               | -                   | 0.523                |
|        | Chromocentric H4K8ac J1 wt   | 28             | -      | 51.2  | 9.04               | -                   | -                    |
|        | Chromocentric H4K8ac J1 TKO  | 22             | -      | 57.8  | 6.27               | -                   | 0.368                |
|        | Nuclear H4K16ac J1 wt        | 26             | -      | 49.97 | 8.14               | -                   | -                    |
|        | Nuclear H4K16ac J1 TKO       | 23             | -      | 38.19 | 10.76              | -                   | 0.832                |
|        | Chromocentric H4K16ac J1 wt  | 26             | -      | 63.8  | 8.34               | -                   | -                    |
|        | Chromocentric H4K16ac J1 TKO | 23             | -      | 57.8  | 4.63               | -                   | 0.551                |
| S20B   | Nuclear H3K9m3 J1 wt         | 30             | -      | 49.08 | 11.01              | -                   | -                    |
|        | Nuclear H3K9m3 J1 TKO        | 26             | -      | 38.82 | 7.19               | -                   | 0.16                 |
|        | Chromocentric H3K9m3 J1 wt   | 30             | -      | 80.46 | 8.82               | -                   | -                    |
|        | Chromocentric H3K9m3 J1 TKO  | 26             | -      | 65.32 | 5.97               | -                   | 0.132                |
|        | Nuclear H4K20m3 J1 wt        | 34             | -      | 19.83 | 4.83               | -                   | -                    |
|        | Nuclear H4K20m3 J1 TKO       | 29             | -      | 21.65 | 7.33               | -                   | 0.622                |
|        | Chromocentric H4K20m3 J1 wt  | 34             | -      | 38.09 | 7.95               | -                   | -                    |
|        | Chromocentric H4K20m3 J1 TKO | 29             | -      | 33.36 | 9.64               | -                   | 0.403                |

<sup>a</sup> n: number of cells of all replicates (if not stated otherwise), StDev: standard deviation, 95% CI: 95% confidence interval, p-value: calculated as stated in figure legends and material and methods section.

<sup>b</sup> n numbers refer to independent PCRs analyzed and p-value is calculated against the band intensities of the dC containing experiment.

<sup>c</sup> 2 way ANOVA statistical analysis did not reveal any significant difference (n.s.) between dC, d5mC and d5hmC.

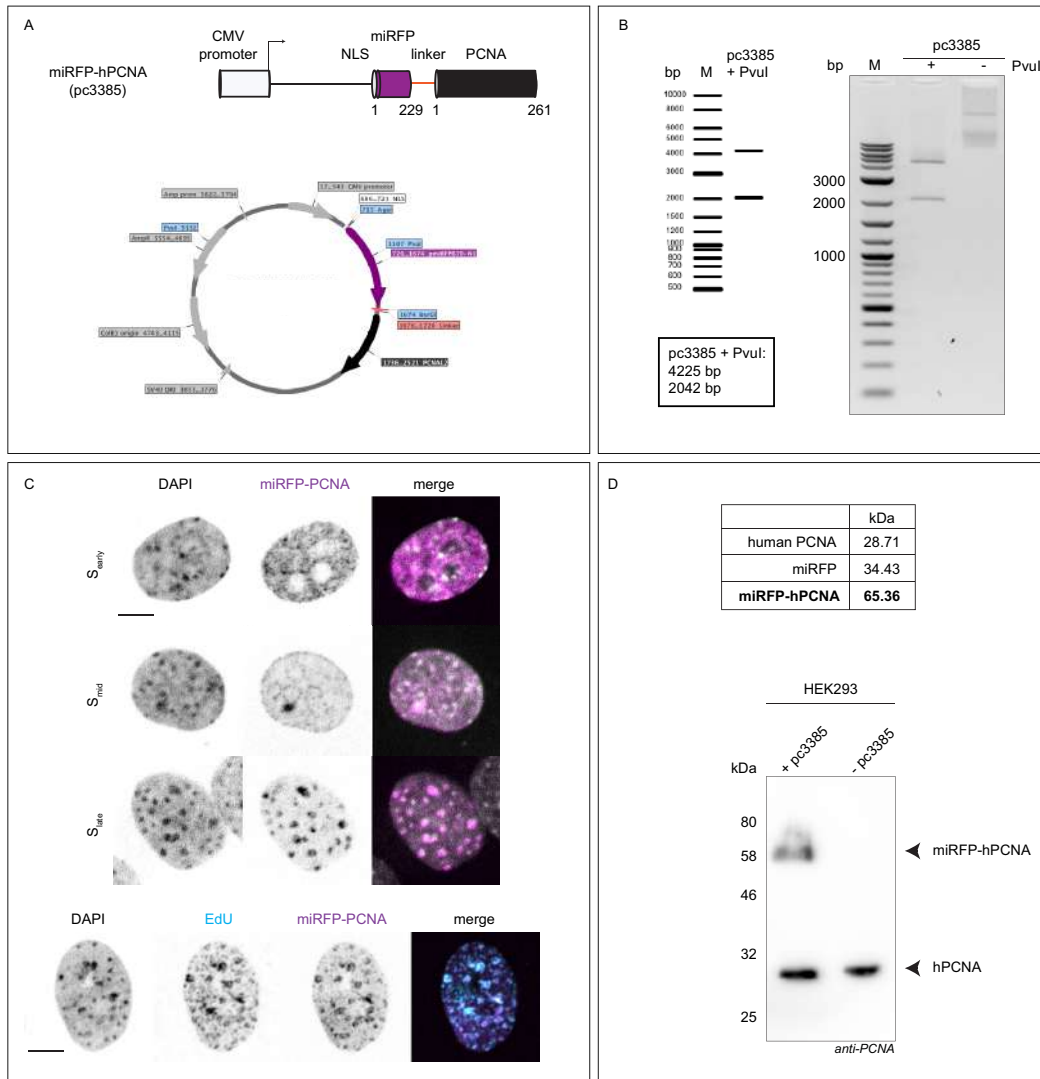

**Supplementary Figure 1 – Characterization of the pmirFP-PCNA plasmid.** (A) miRFP was cloned into the RFP-hPCNA plasmid (pc1054) as described in the materials and methods section, to generate the miRFP-hPCNA plasmid (pc3385). The gene expression in mammalian cells is driven by a CMV promoter. Plasmid map shows all important vector components, including the restriction sites used for cloning (AgeI & BsrGI) and control digest (PvuI) of the recombinant plasmid. (B) Control digest of the miRFP-hPCNA construct using PvuI results in two bands of 4225 bp and 2042 bp, respectively. M stands for DNA size marker. (C) The subcellular localization of the miRFP-hPCNA construct was validated by microscopical analysis in transfected C2C12 mouse myoblast cells. The miRFP-hPCNA fusion protein showed the early, mid and late S-phase pattern described for somatic cells.  $S_{early}$  is characterized by a homogeneous distribution of replication throughout the nucleus, in  $S_{mid}$  replication signals are observed at the nucle(ol)ar periphery and  $S_{late}$  is marked by fewer but larger replication signals co-localizing with DAPI intense stained chromocenters. Labeling transfected cells with EdU resulted in a co-localization of the detection of nascent DNA (EdU) and the marked replisome component (miRFP-PCNA). (D) The expected miRFP-hPCNA fusion protein was detected via western blotting using a PCNA specific antibody. HEK293 cells were transfected with pc3385, lysed in loading dye and whole cell lysates were analyzed by SDS-PAGE gel electrophoresis followed by blotting onto a nitrocellulose membrane. Detection with anti-PCNA antibody showed bands at the size of the miRFP-hPCNA fusion protein (65 kDa) and the untagged endogenous PCNA (29 kDa), whereas the untransfected control cells (-pc3385) only showed signal for the endogenous PCNA. Scale bar = 5  $\mu$ m. pc numbers refer to the plasmid collection numbers.

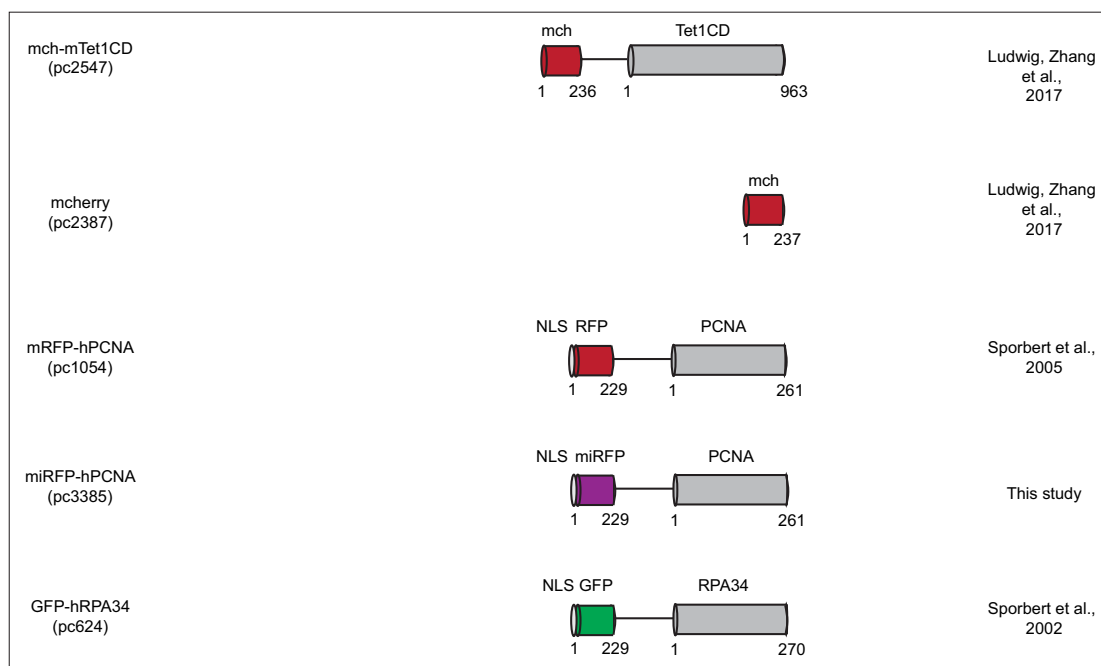

**Supplementary Figure 2 – Schematic illustration of the relevant protein domains encoded in the plasmids used.** Amino acid coordinates are indicated below every structure. pc numbers refer to the plasmid collection numbers. Respective publications are indicated. Plasmid construction details are described in the materials and methods part for the plasmids not published before. m: mouse, h: human, NLS: nuclear localization signal.

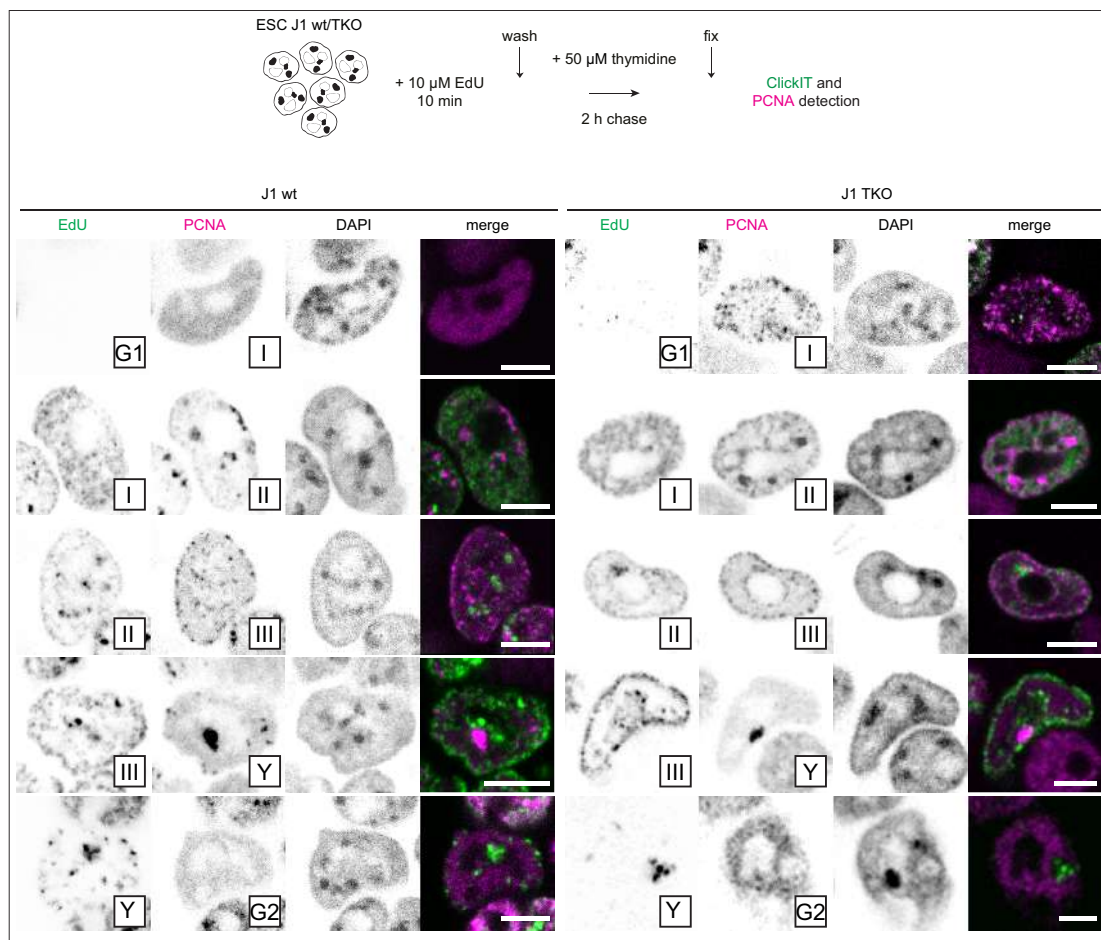

**Supplementary Figure 3 – Effect of loss of global DNA methylation on the spatio-temporal progression of DNA replication in ES cells.** J1 wt and TKO ES cells were pulse labeled with EdU and fixed after a chase period of 2 hours. (Immuno)fluorescent detection of the nucleotide analogue and endogenous PCNA allowed the analysis of the spatio-temporal progression of S-phase in fixed cells. Representative confocal images of the transitions from G1 to stage I, S-phase substage progressions and progression from stage Y to G2 are shown. Scale bar = 5  $\mu\text{m}$ .



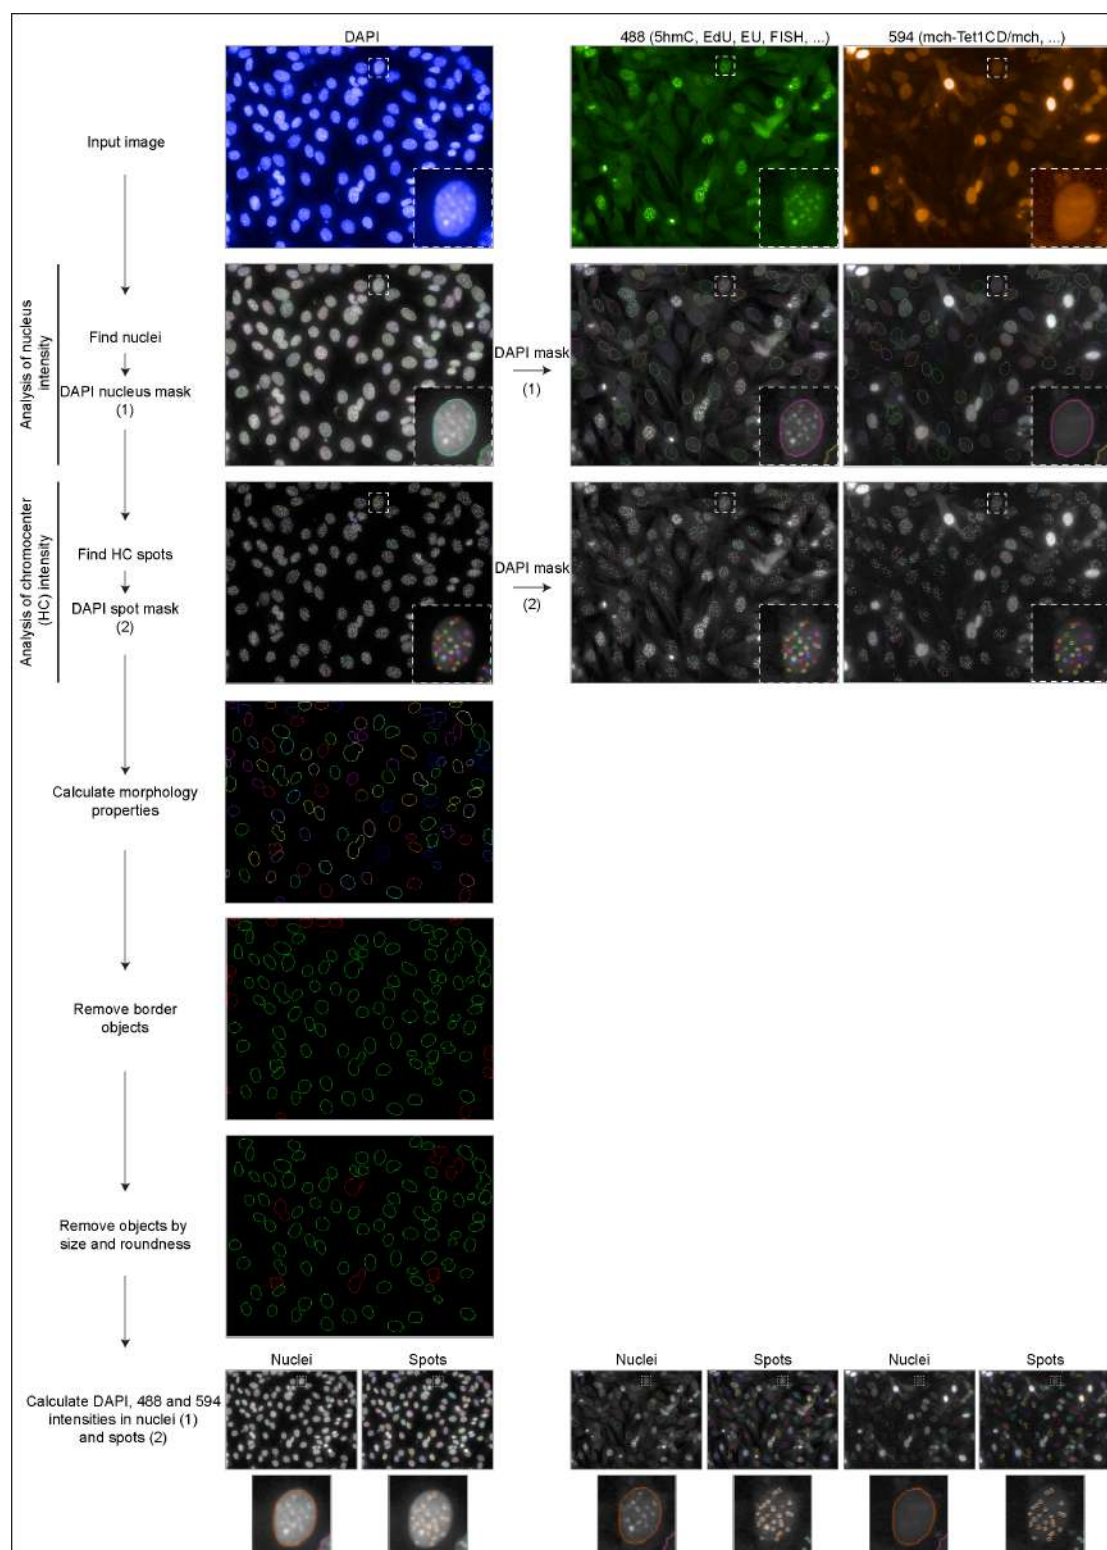

**Supplementary Figure 4 – High content screening microscopy analysis pipeline.**

Analysis of high content screening microscopy images was done using the PerkinElmer Harmony software. Nuclei and chromocenters (HC spots) were found and masked based on the DAPI input images. DAPI masks were used to segment 488 nm and 594 nm channel images. Morphology properties of segmented nuclei were calculated (roundness, area, ...), border objects were removed from the analysis and objects were further selected according to their size and roundness. Intensities of the DAPI, 488 and 594 channels were calculated for whole nuclei, chromocenter spots or nucleoli.

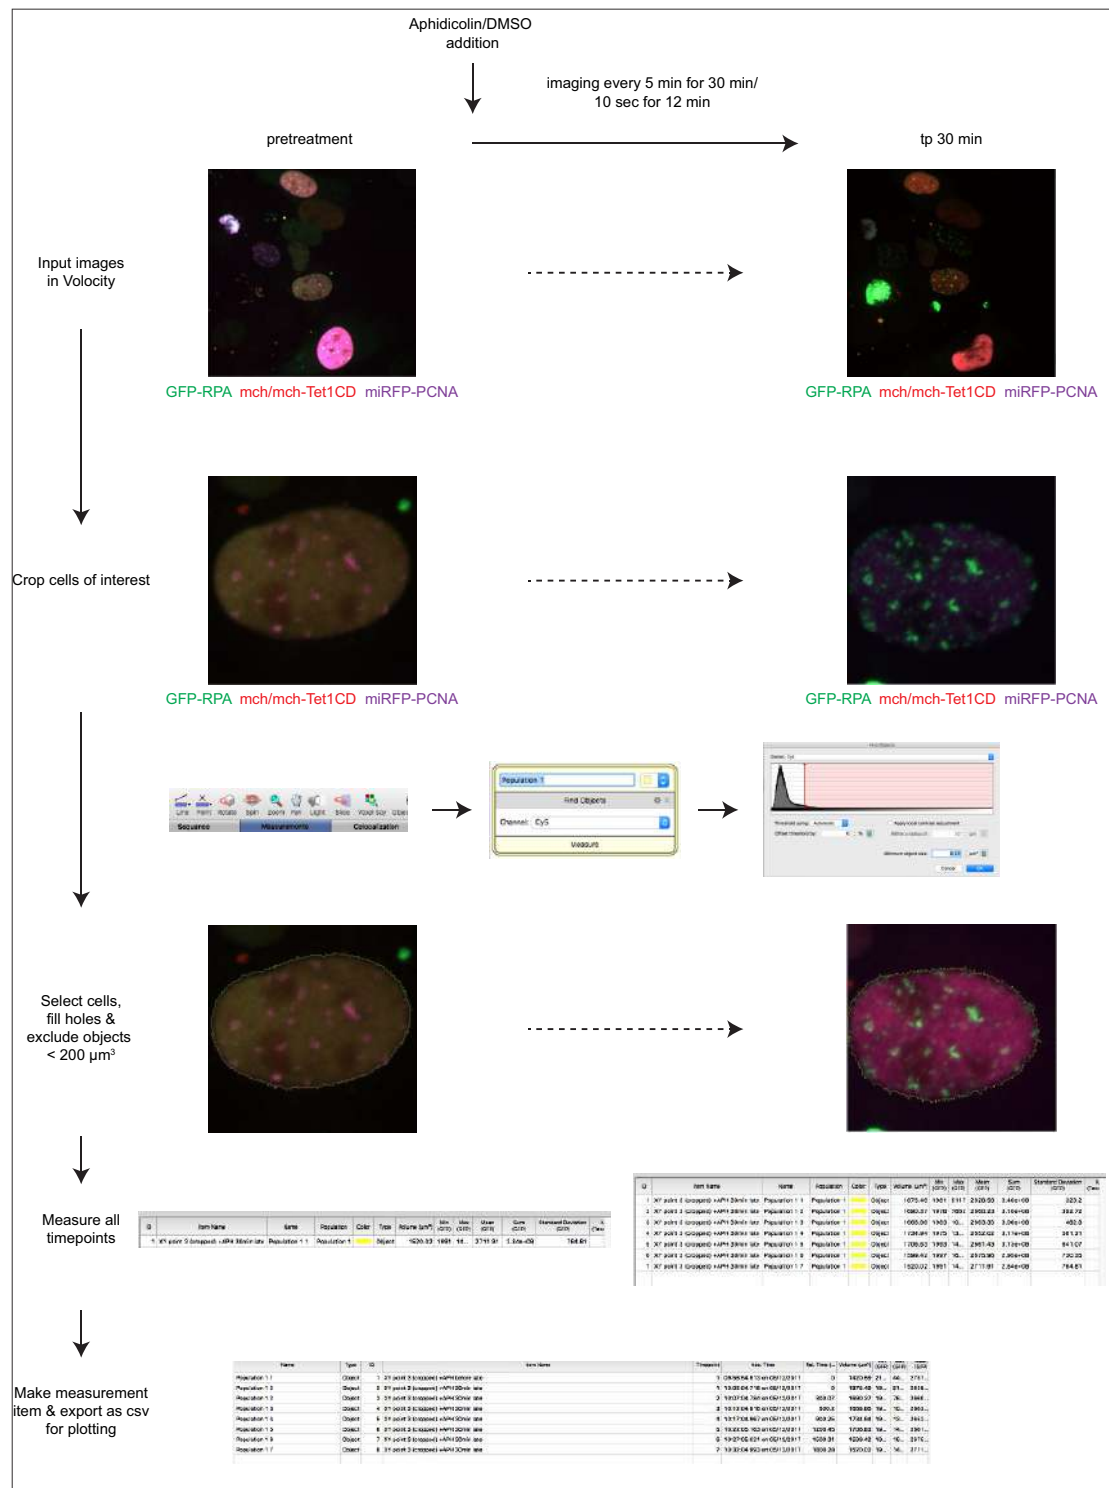

**Supplementary Figure 5 – Live cell RPA accumulation analysis pipeline.** Analysis of live cell microscopy images was done using the PerkinElmer Volocity software. Cells of interest were cropped in all images/timepoints. Cells were masked based on the GFP or miRFP signal. Objects smaller than 200 μm<sup>3</sup> were excluded and holes within the mask were filled. Signal intensities were measured in pretreatment and for all timepoints of treated cells. Measurements were grouped, saved and exported as csv files for further analysis and plotting as described in the Material and Methods section.

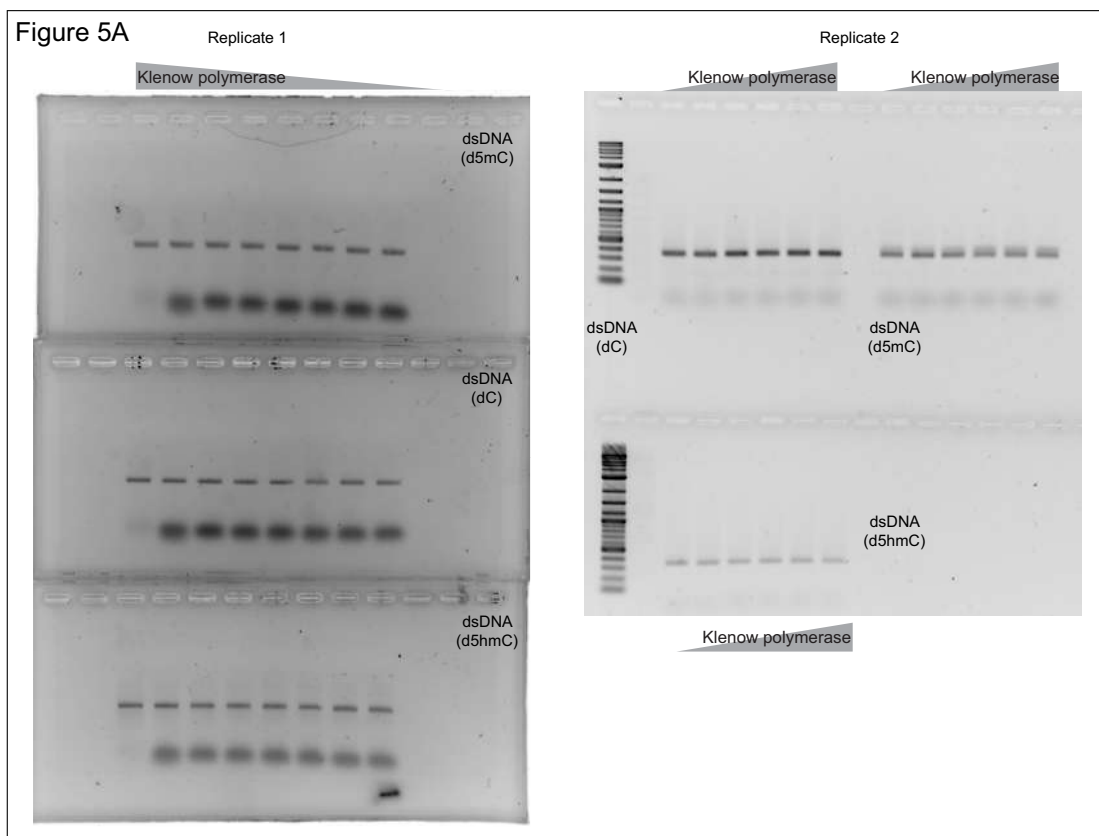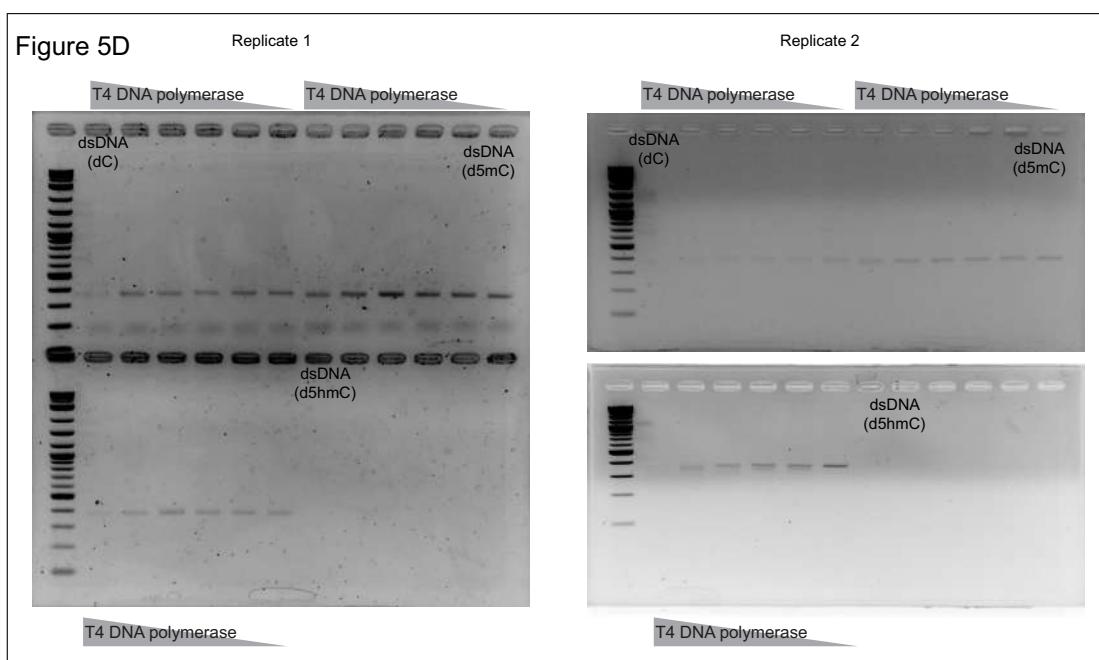

**Supplementary Figure 6 – Full gel images used for the analysis of the Klenow (Figure 5A) and T4 polymerase assays (Figure 5D). The two independent replicates are shown.**

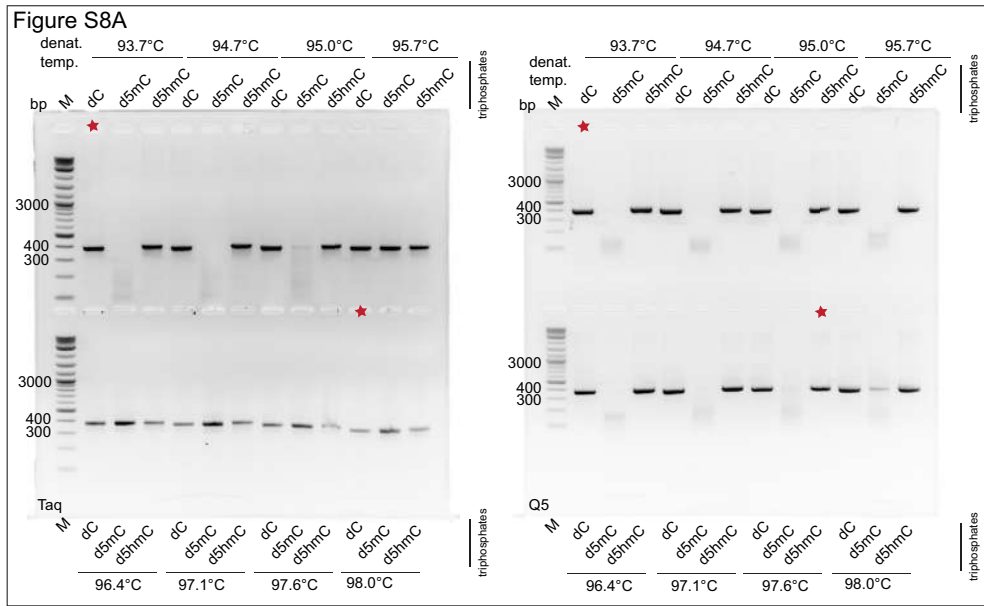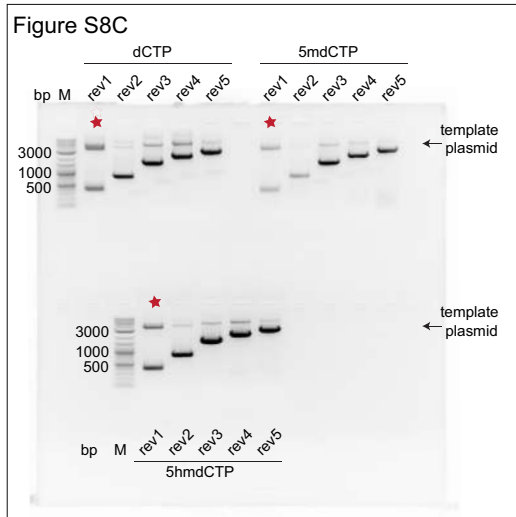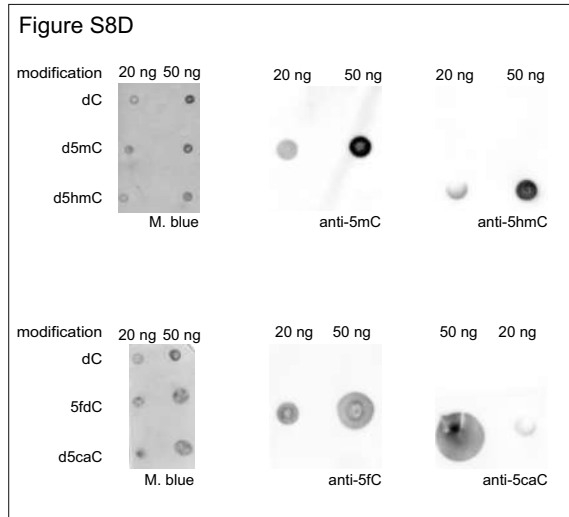

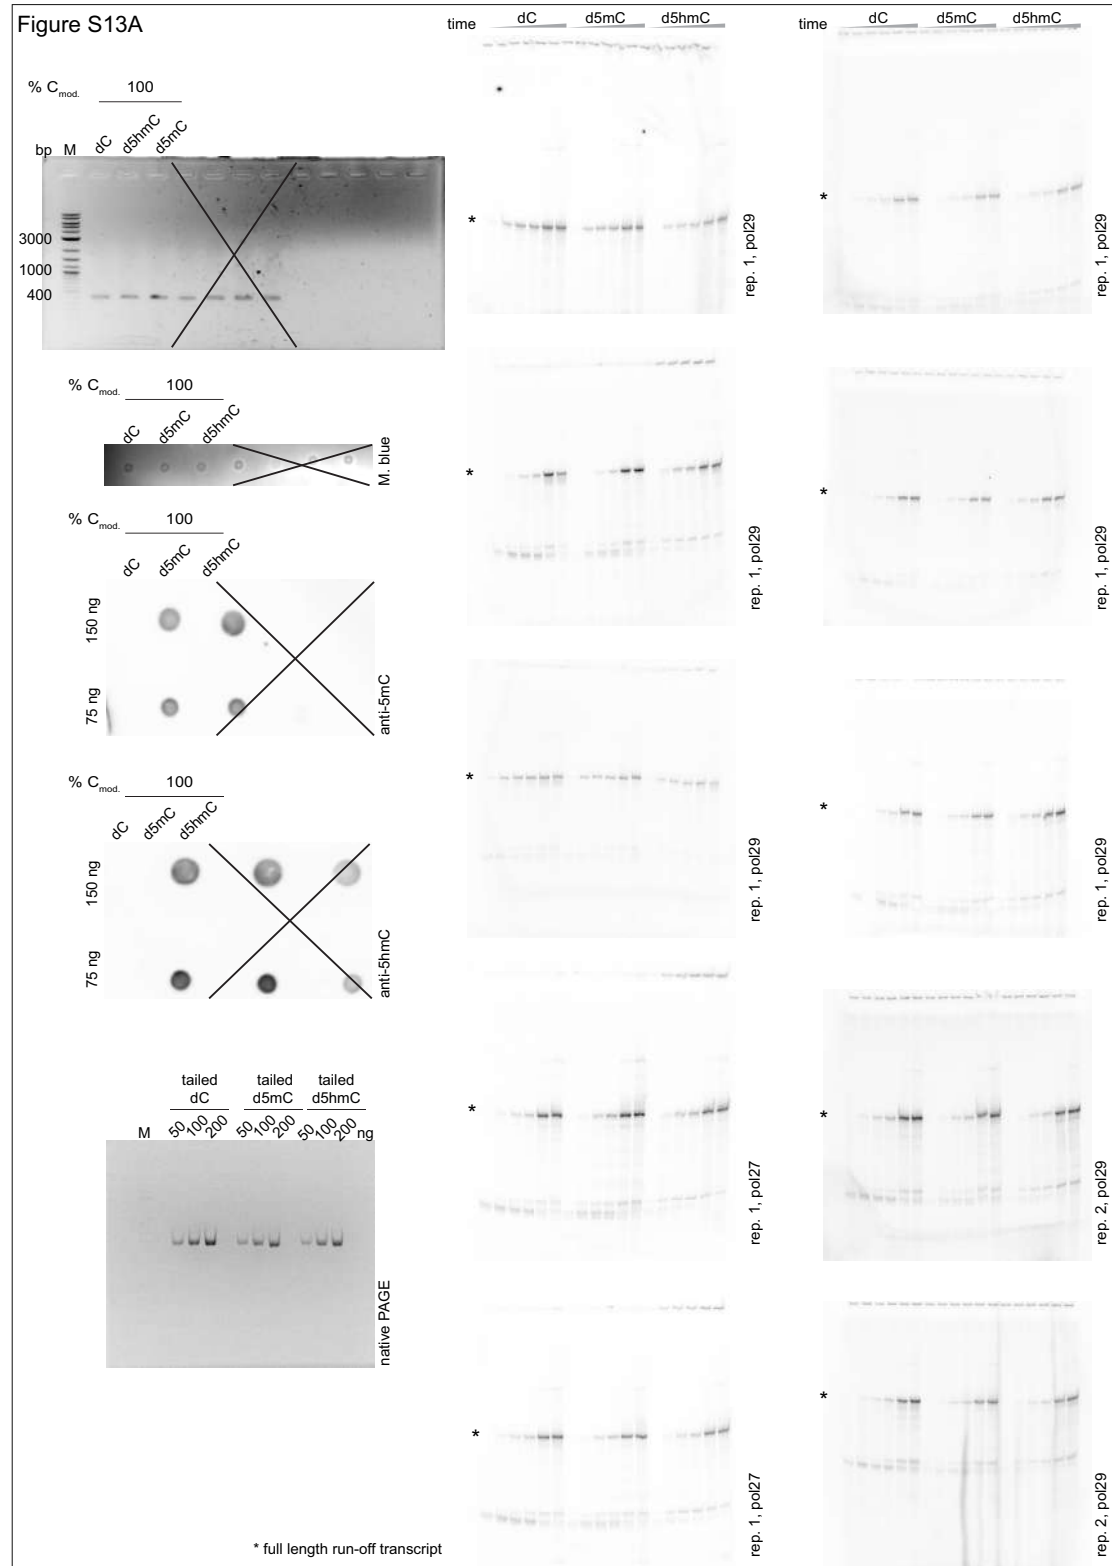

Figure S14A

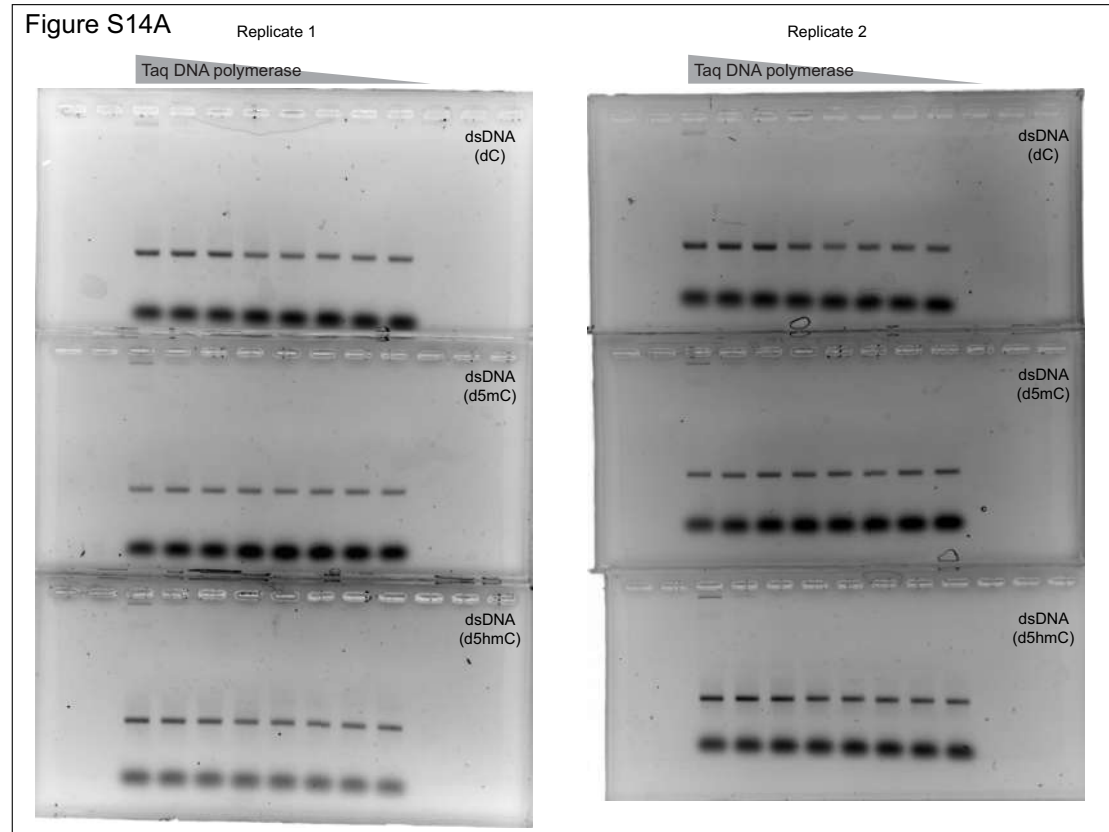

Figure S15A

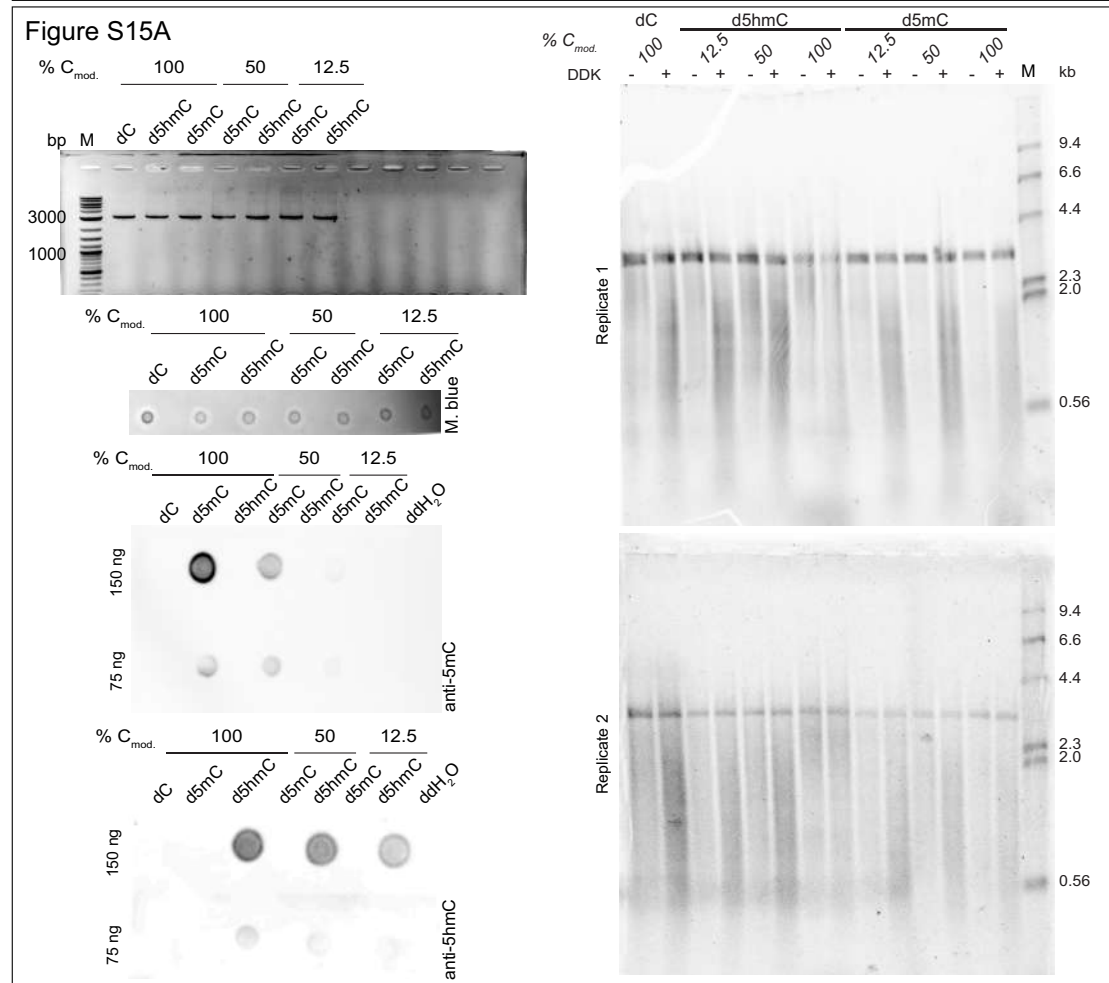

**Supplementary Figure 7 – Full gel images used for polymerase efficiency assays (Supplementary Figure 8A), PCR yield assays (Supplementary Figure 8C), slot blot analysis of modified PCR fragments (Supplementary Figure 8D), *in vitro* yeast RNA polymerization assays (Supplementary Figure 13A), Taq polymerase assays (Supplementary Figure 14A) and *in vitro* yeast replication assays (Supplementary Figure 15A).** The independent replicates of the assays are shown if applicable. Crossed out parts of gels and blots were not used in the manuscript.



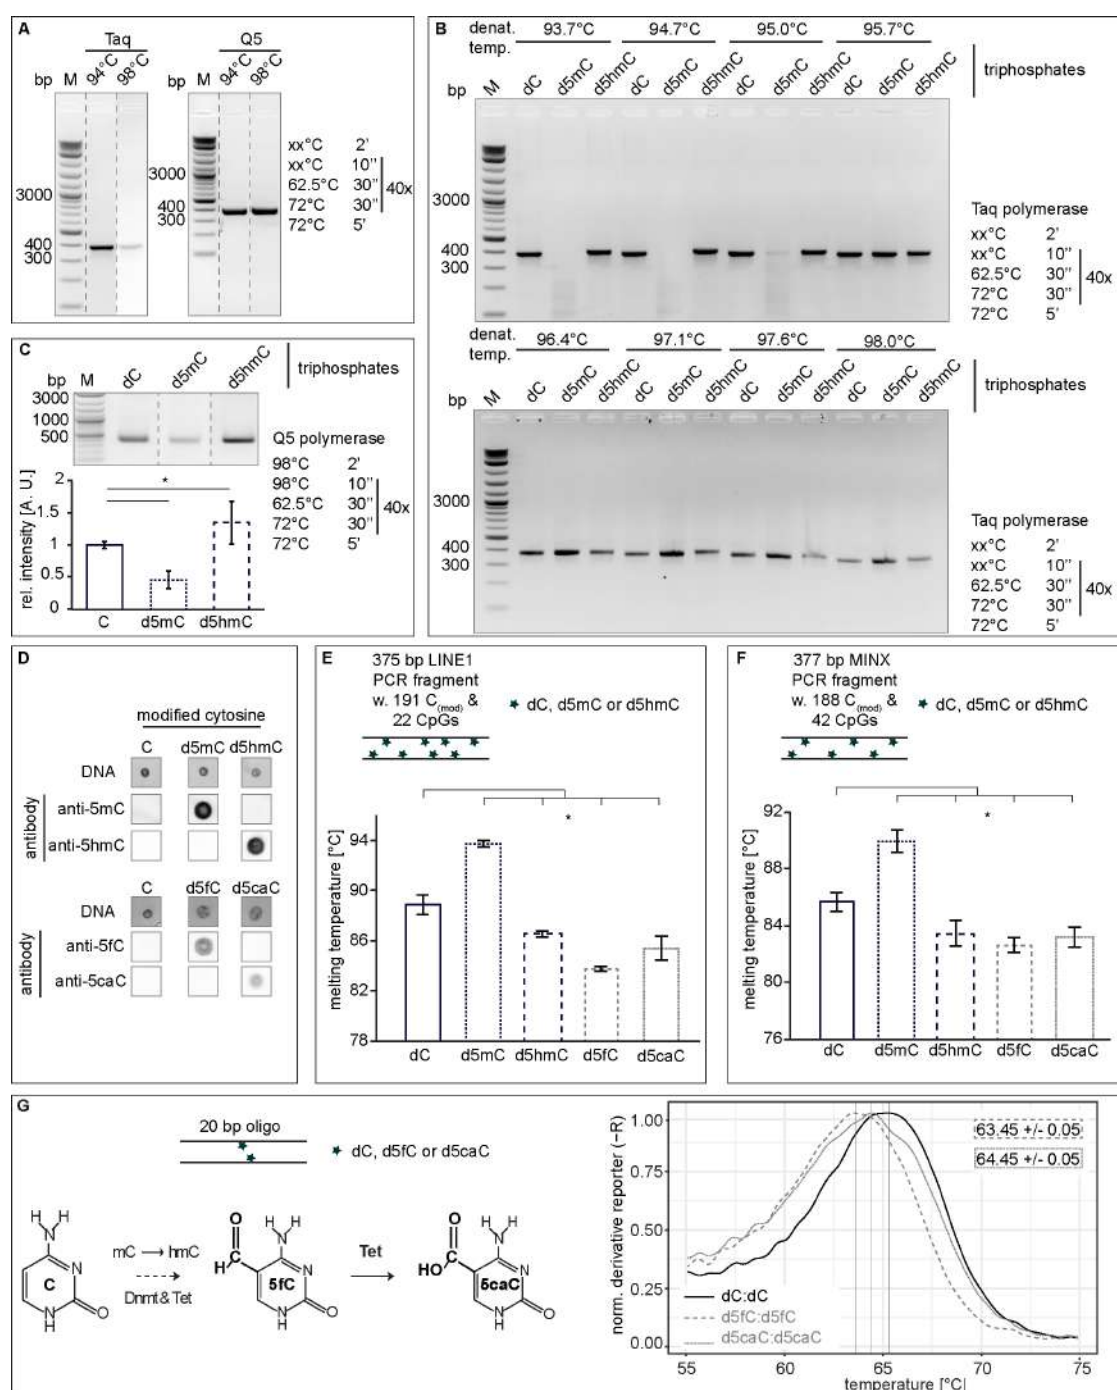

**Supplementary Figure 8 – Effect of cytosine modifications on DNA double helix stability *in vitro*.** (A) Agarose gel electrophoretic analysis of MINX PCR amplification efficiency obtained with Taq and Q5 polymerase with dCTP and using denaturing temperatures of 94°C and 98°C. (B) Agarose gel electrophoretic analysis of MINX PCR amplification products generated with Taq polymerase, denaturing temperatures between 93°C and 98°C and using dCTP, d5mCTP or d5hmCTP. (C) Agarose gel electrophoretic analysis of MINX PCR amplification product yields obtained with Q5 polymerase and using dCTP, d5mCTP or d5hmCTP and normalized quantification of PCR band intensities. (D) Slot blot analysis of dC, d5mC, d5hmC, d5fC and d5caC PCR amplicons. 20 ng of DNA were loaded and membranes were stained with methylene blue as a loading control (DNA). Membranes were incubated with anti-5mC, anti-5hmC, anti-5fC and anti-5caC antibodies, respectively and detected with an HRP conjugated secondary antibody. Exposure times and image contrast were adjusted for every antibody. (E-F), Melting temperature of LINE1 PCR



amplicons (**E**) and MINX PCR amplicons (**F**) containing 100% dC, d5mC, d5hmC, d5fC or d5caC, respectively (except primer sites), as determined by high resolution melting (HRM) temperature analysis. (**G**) Modified cytosine bases with the respective writer enzymes are depicted. High resolution melting temperature (HRM) analysis of 20 bp oligonucleotides containing one central (modified) CpG dinucleotide (CpG, 5fCpG or 5caCpG). Independent experiments were repeated in triplicates with four technical replicates (**E**, **F** and **G**), error bars represent standard deviation and *p* and *n*-values are summarized in Supplementary Table 8. Complete PCR conditions are indicated. M stands for DNA size markers. All quantifications of band intensities are depicted as a ratio to the respective controls. Full gels and blots are shown in Supplementary Figure 7. \* *p* < 0.05.

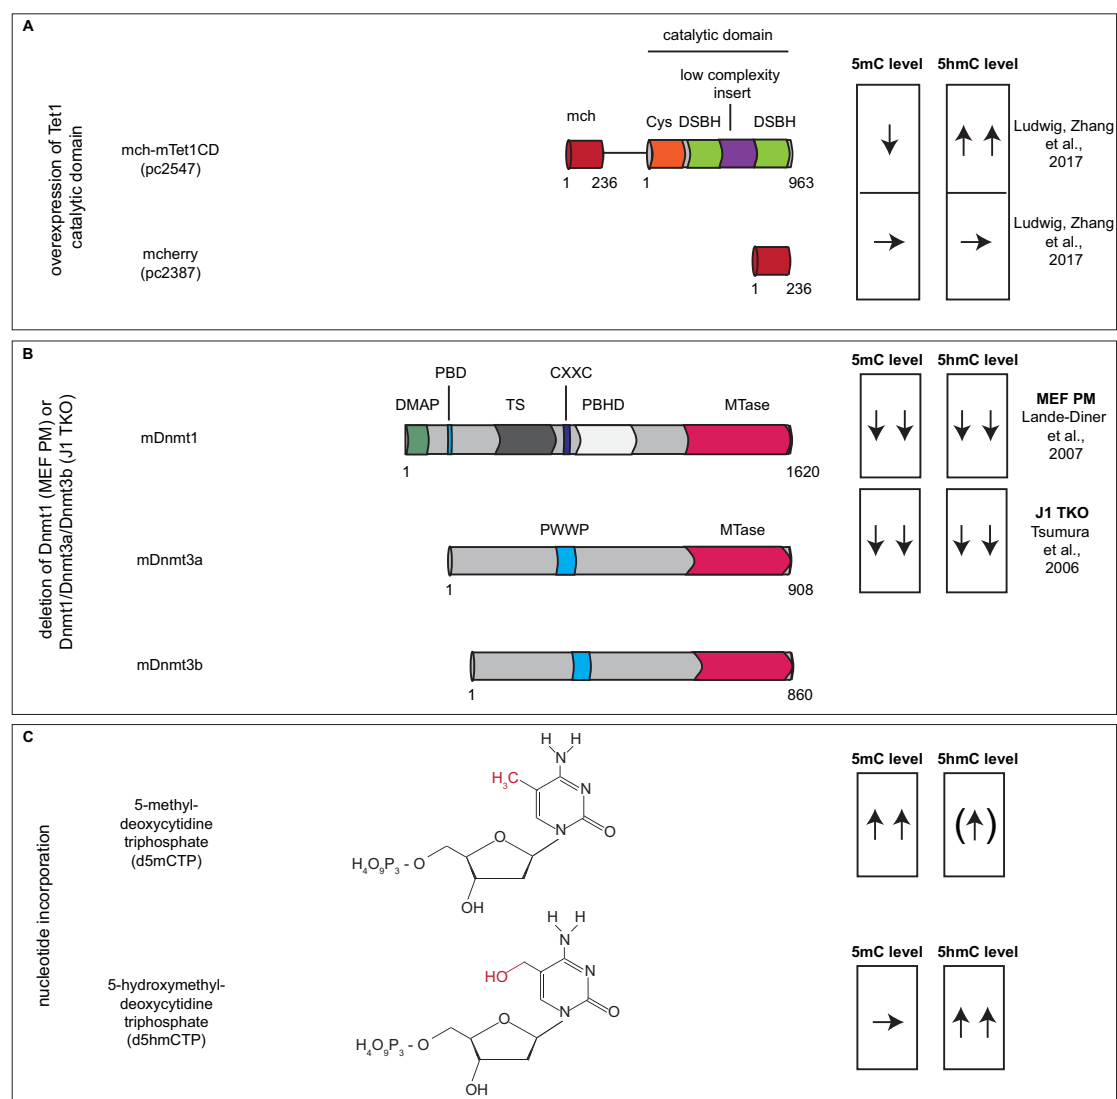

**Supplementary Figure S9 – Graphical summary of the strategies and outcomes for manipulation of cytosine levels in cells.** Amino acid coordinates are indicated below every structure. pc numbers refer to the plasmid collection numbers. **(A)** Overexpressing constructs with mcherry tagged Tet1 catalytic domain lead to increased 5hmC levels. **(B)** Genomic knock-outs of Dnmt1 (MEF PM) or Dnmt1, Dnmt3a and Dnmt3b (J1 TKO) lead to the loss of all DNA cytosine modifications. **(C)** Transfection of cells with methylated or hydroxymethylated cytosine nucleotides lead to increased genomic 5mC and 5hmC levels, respectively.

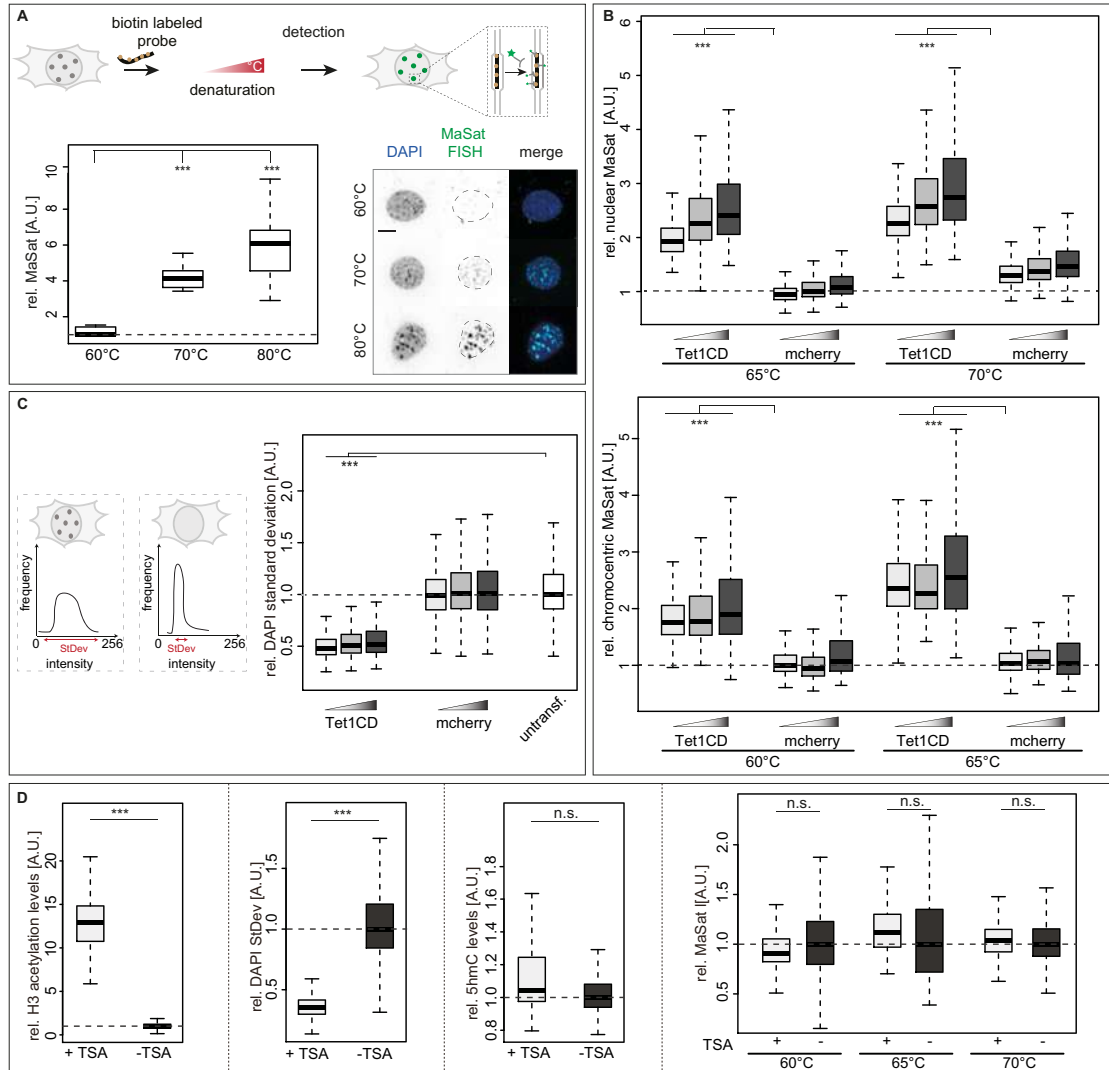

**Supplementary Figure 10 – Effect of cytosine modifications on genomic DNA double helix stability *in vivo*.** (A) Experimental setup to determine the optimal denaturing temperatures for major satellite DNA FISH assays. Relative major satellite DNA FISH sum intensities of C2C12 cells denatured at 60°C, 70°C or 80°C and representative spinning disk confocal images for every denaturing temperature are shown. (B) Relative major satellite DNA FISH sum intensities on transfected C2C12 mouse myoblast cells are plotted. DNA denaturation was done at 60°C, 65°C and 70°C, respectively. MaSat signal intensities were measured in the whole nucleus (defined by DAPI counterstaining, up) and in pericentric heterochromatin (chromocenters, down). (C) On a histogram, condensed chromatin is characterized by high DAPI intensities. Thus, cell nuclei containing condensed chromatin show a higher DAPI standard deviation than cells containing decondensed chromatin, which is characterized by low DAPI standard deviations. Normalized DAPI standard deviation values, as a proxy for DNA decondensation levels, 24 hours post transfection of C2C12 cells are plotted. (D) Relative histone H3 acetylation sum intensities, DNA decondensation, 5hmC and major satellite DNA FISH sum intensities in C2C12 cells after 72 hours of TSA treatment. Independent experiments were done in duplicates (A) or in triplicates (B, C and D). All fluorescent signals are plotted as a ratio to the values of the respective control cells. All boxes and whiskers represent 25–75 percentiles and 1.5 times the IQD (interquartile distance), respectively and the center line depicts the median. *p* and *n*-values are summarized in Supplementary Table 8. Scale bar = 5  $\mu$ m. \*\*\* *p* < 0.001, n.s.: non-significant and CC: chromocenters.

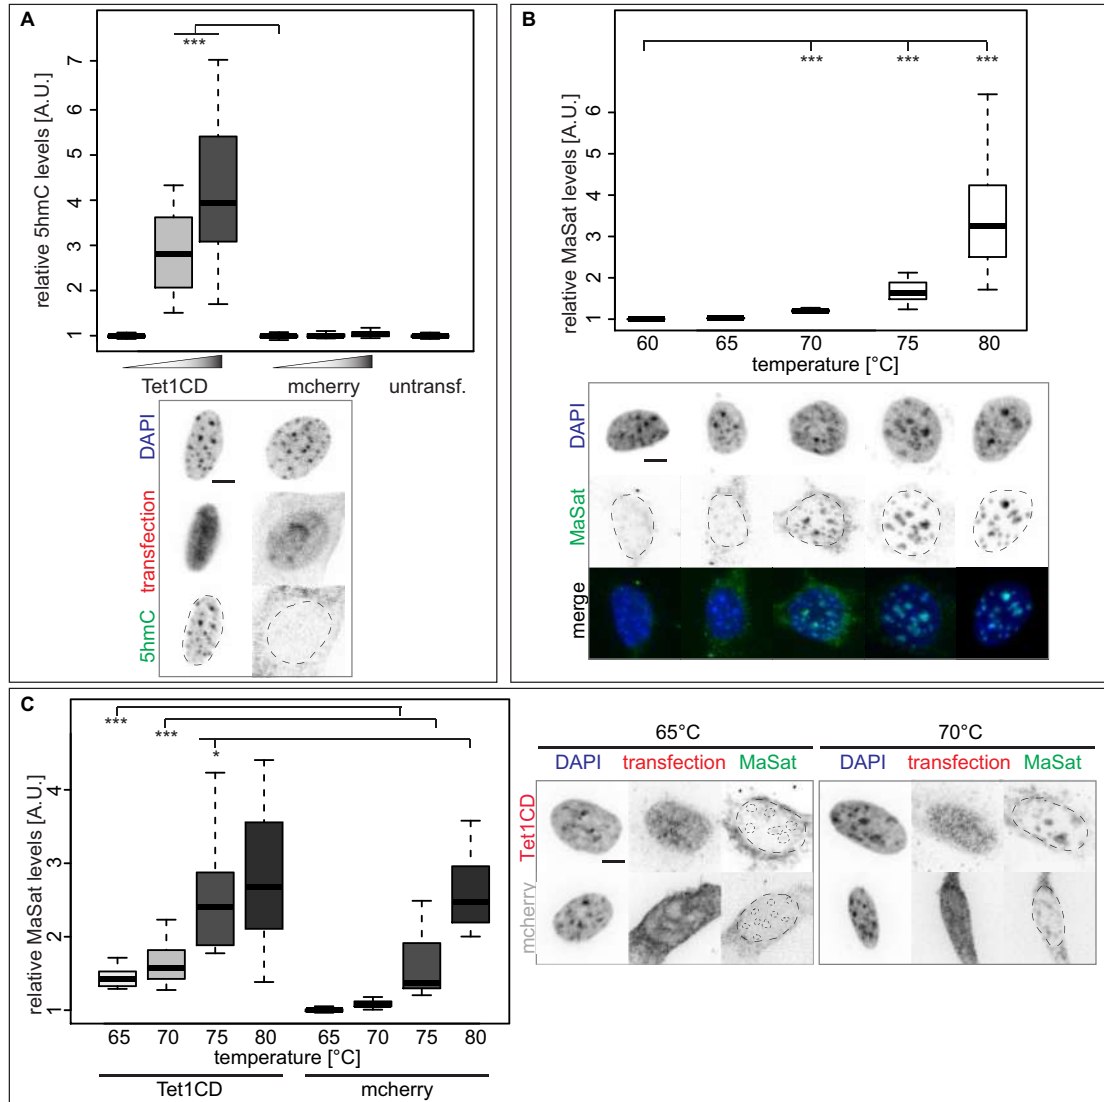

**Supplementary Figure 11 – Effect of cytosine modifications on DNA double helix stability in mouse embryonic fibroblasts *in vitro*.** (A) Relative 5hmC sum intensities in MEF cells, 24 hours after transfection and representative spinning disk confocal images for every transfection condition are shown. (B) Relative major satellite DNA FISH sum intensity signals of MEF cells with denaturing temperatures of 60°C, 65°C, 70°C, 75°C and 80°C and representative spinning disk confocal images for every denaturing temperature are depicted. (C) Relative nuclear major satellite DNA FISH sum intensities transfected mouse embryonic fibroblast cells with DNA denaturation at 65°C, 70°C, 75°C and 80°C, respectively are plotted. Representative spinning disk confocal images at 65°C and 70°C are shown. Independent experiments were done in triplicates. Dotted lines represent nuclear and chromocenter contours. All boxes and whiskers are as in Supplementary Figure 10 and *p* and *n*-values are summarized in Supplementary Table 8. Scale bar = 5 μm. \* *p* < 0.05 and \*\*\* *p* < 0.001.

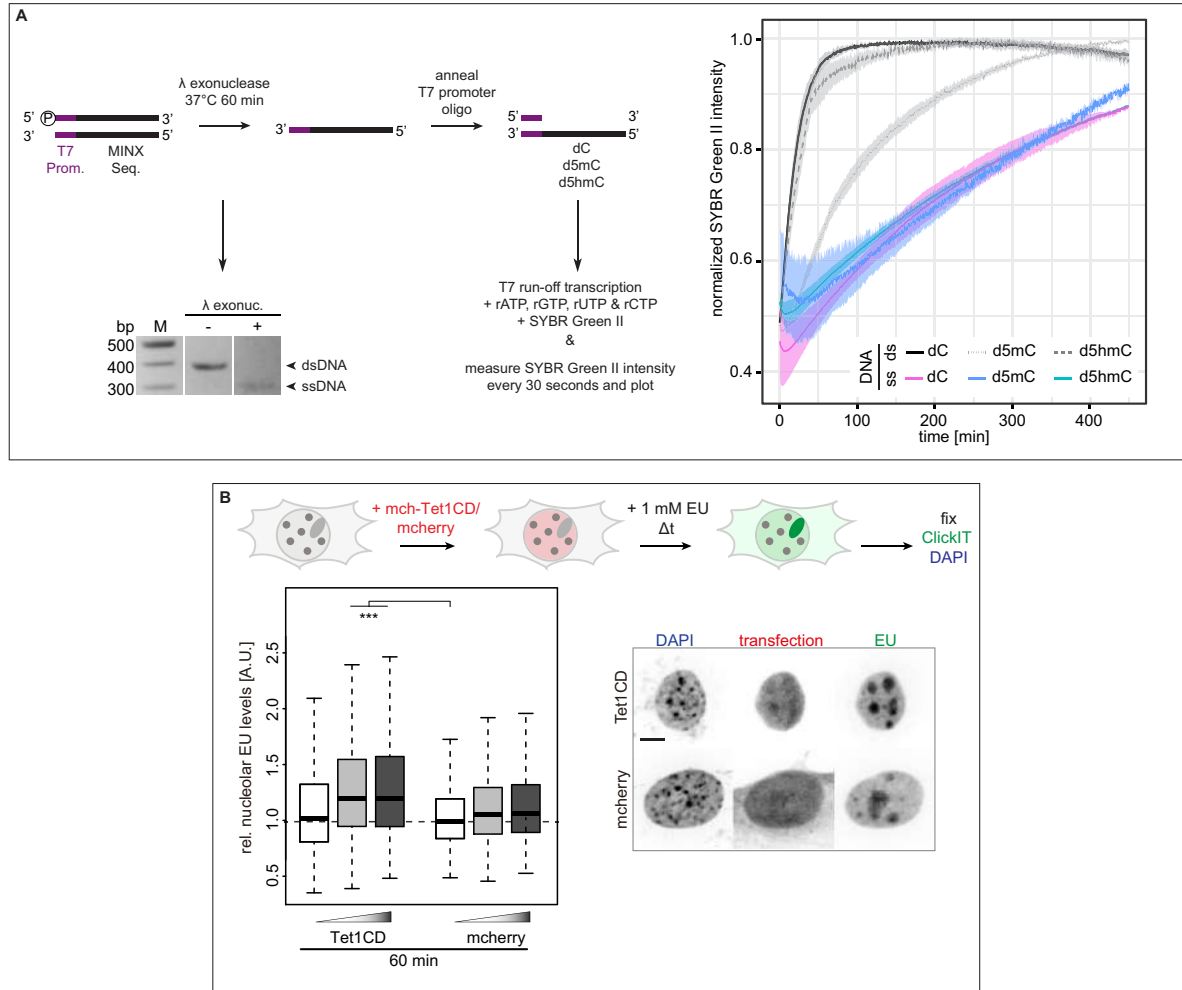

**Supplementary Figure 12 – Effect of cytosine modifications on RNA polymerase activity *in vivo*.** **(A)** Experimental setup for *in vitro* T7 run-off transcription on double-stranded (dsDNA) and single-stranded (ssDNA). To generate ssDNA templates, dsDNA PCR amplicons with a 5' phosphorylated forward strand were digested with  $\lambda$  exonuclease. To allow polymerase binding, ssDNA templates contained a dsDNA T7 promoter region. Template DNA contained 100% cytosine (dC), methylcytosine (d5mC) or hydroxymethylcytosine (d5hmC) and T7 promoter sequence was unmodified. Normalized mean SYBR green II intensities ( $\pm$  standard deviation), i.e., the amount of RNA transcripts, over time are shown. **(B)** Schematic representation of the experimental setup for *in vivo* ribonucleotide incorporation analysis. Transfected cells were incubated with 1 mM EU 24 hours post transfection, EU was detected and nucleolar EU sum intensities are plotted. Representative spinning disk confocal images of every transfection condition are depicted. Independent experiments were done in triplicates. All boxes and whiskers are as in Supplementary Figure 10 and  $p$  and  $n$ -values are summarized in Supplementary Table 8. Scale bar = 5  $\mu$ m. \*\*\*  $p < 0.001$ .

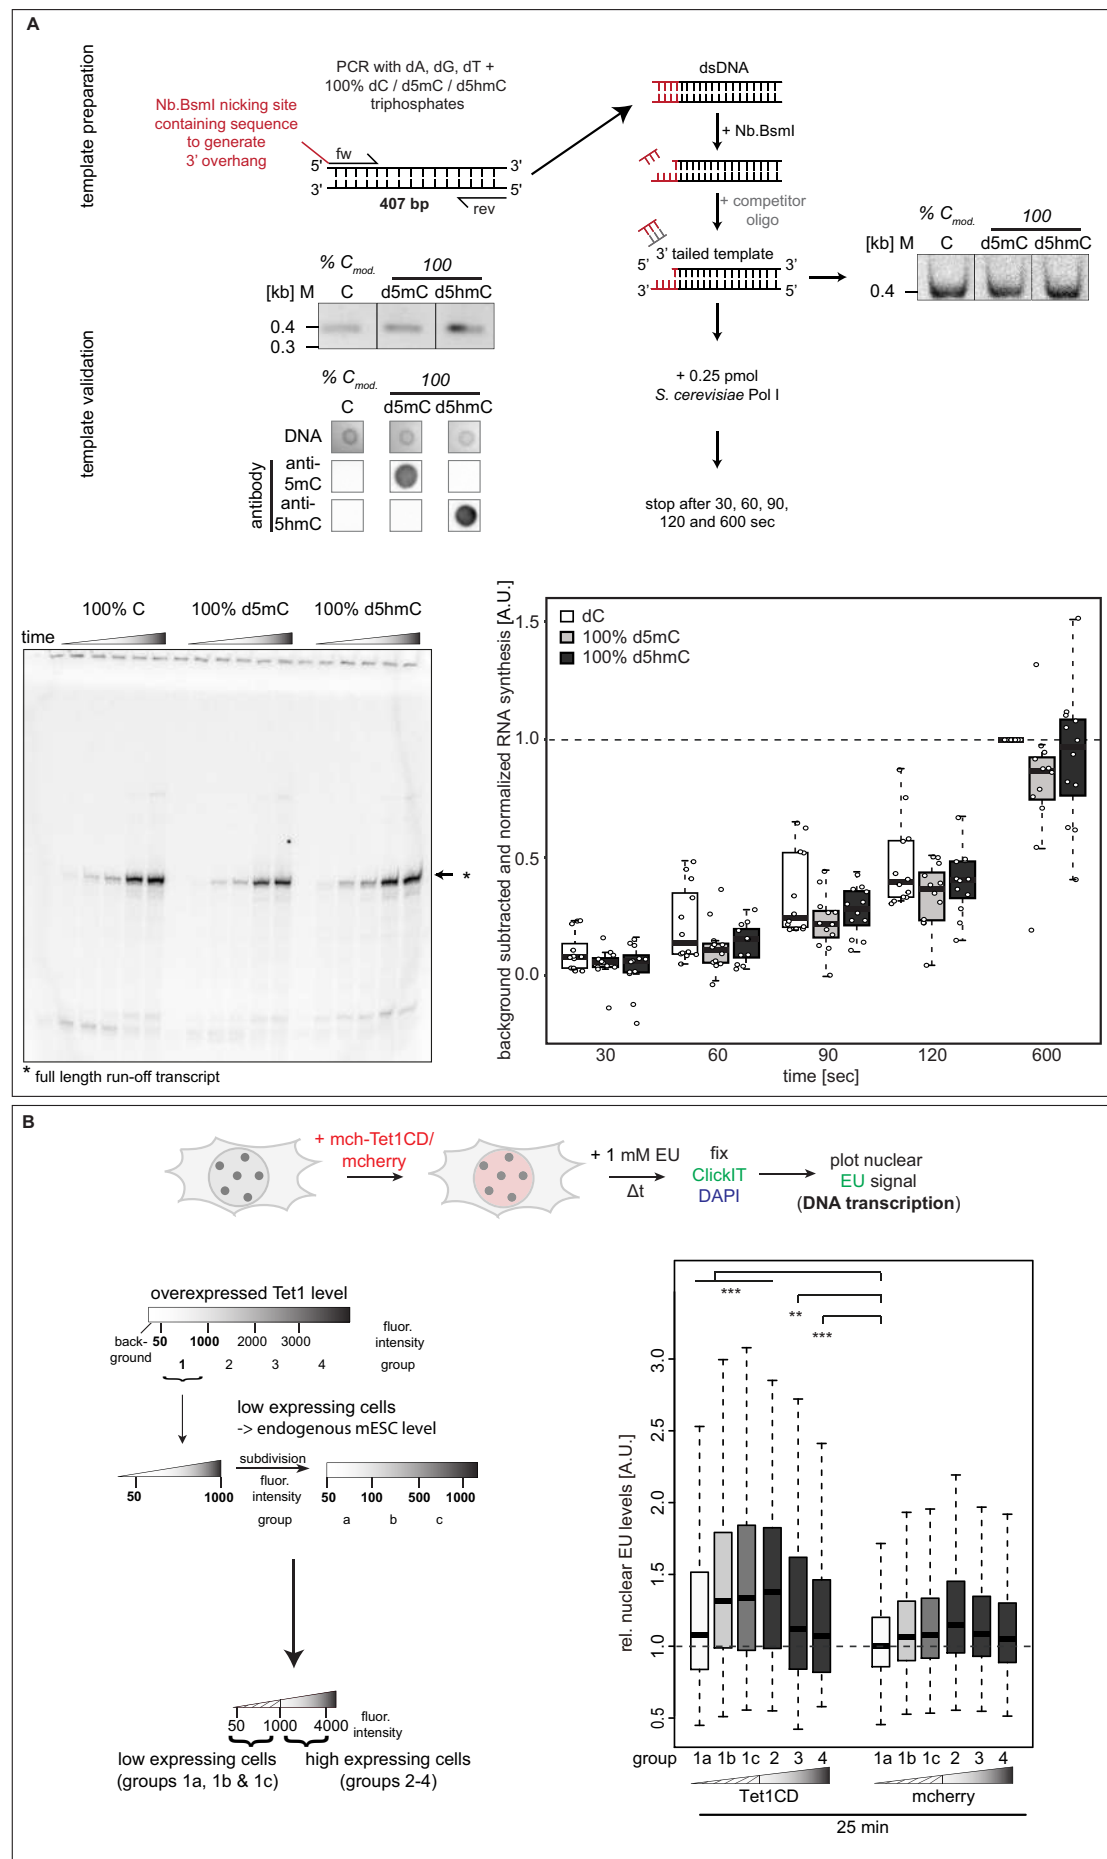

**Supplementary Figure 13 – Effect of cytosine modifications on eukaryotic RNA polymerase activity.** **(A)** Experimental setup and biochemical validation of the template generation for *in vitro* polymerization assays. Template DNA contained 100% cytosine (dC) or methylcytosine (d5mC) or hydroxymethylcytosine (d5hmC), respectively (except primer sites). Exemplary agarose gel images and slot blot analysis of dC, d5mC and d5hmC levels are shown. Experimental setup for RNA polymerization assay using purified *S. cerevisiae* Polymerase I (Pol I). DNA templates were digested with the nicking enzyme Nb.BsmI to generate templates with a 3' overhang. Equal DNA amounts after nicking and DNA cleanups are confirmed by native PAGE gel analysis. An exemplary urea-PAGE gel image is shown. Background subtracted and normalized (to dC) full length run-off transcript intensities (400 bp, marked by \*) as a proxy for RNA polymerization are shown. **(B)** Schematic representation of the experimental setup for *in vivo* ribonucleotide incorporation analysis and representation of the cell grouping and binning approach applied. Cells were divided into four main groups, depending on their Tet1CD/mcherry expression levels (group 1: low expressing cells and groups 2-4: high expressing cells). Cells with Tet1 expression levels corresponding to group 1 (fluorescence intensity 50-1000, low Tet1 expressing cells) were further subdivided in three subgroups (fluorescent intensities group 1a: 50-100, group 1b: 100-500 and group 1c: 500-1000) during plotting. Cells were incubated with 1 mM EU 24 hours after transfection, EU was detected and nuclear EU sum intensities are plotted. Data from groups 1a-1a are the same as plotted in Figure 4B. Independent experiments were done with two DNA replicates, two different polymerase batches and in 12 replicates (A) or in triplicates (B) and all boxes and whiskers are as in Supplementary Figure 10. *p* and *n*-values are summarized in Supplementary Table 8. Full gels are shown in Supplementary Figure 7. \*  $p < 0.05$ , \*\*  $p < 0.005$  and \*\*\*  $p < 0.001$ .

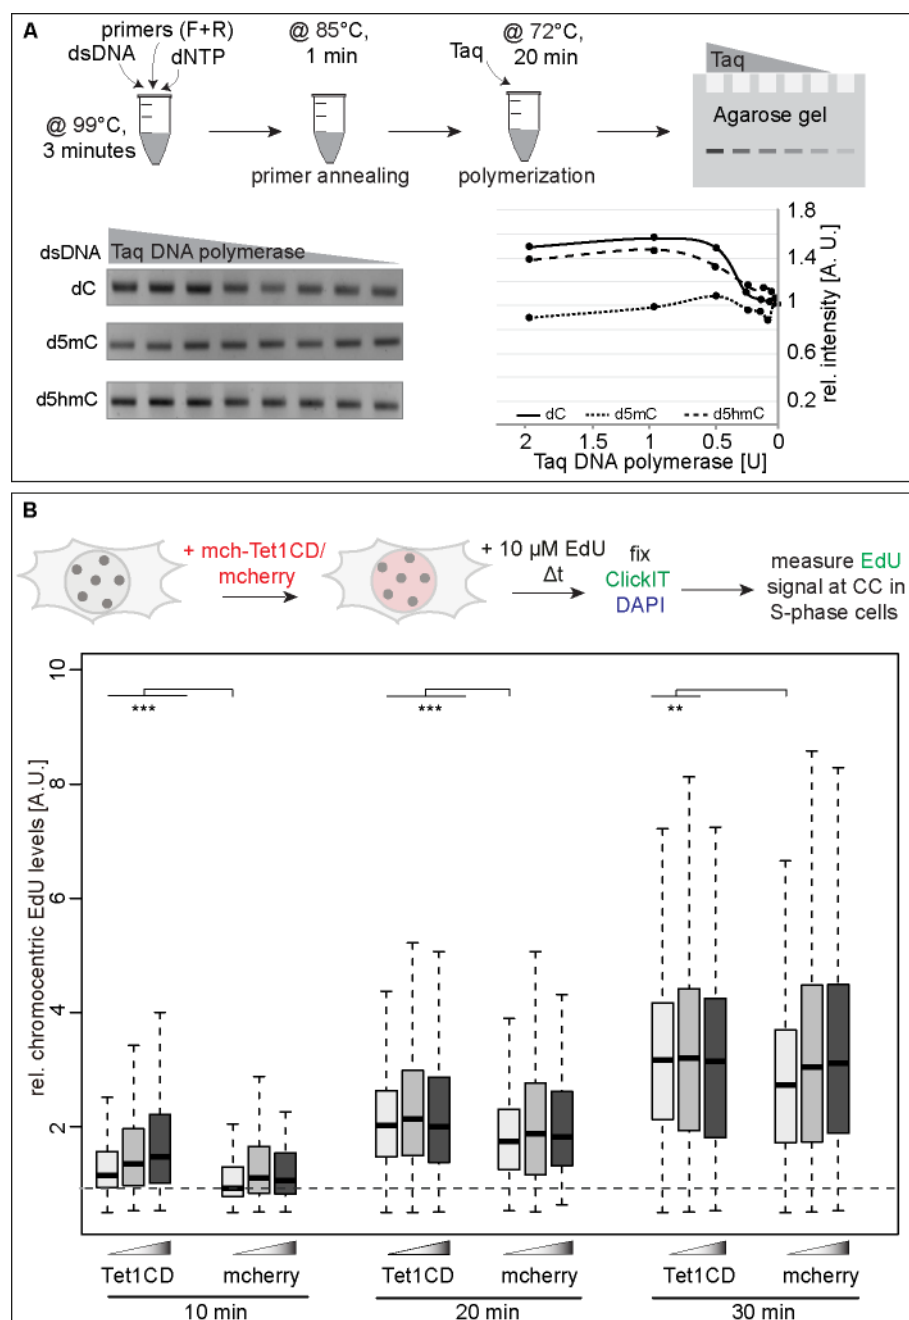

**Supplementary Figure 14 – Effect of cytosine modifications on DNA polymerase activity.** (A) Experimental setup for *in vitro* Taq polymerization assay. Template DNA contained 100% cytosine (dC), methylcytosine (d5mC) or hydroxymethylcytosine (d5hmC) (except primer sites). Exemplary gel images for Taq polymerase assay and sum band intensity quantification as a proxy for DNA polymerization, normalized to the DNA input (0 U enzyme) are shown. (B) Schematic representation of the experimental setup for *in vivo* nucleotide incorporation analysis. Cells were incubated with 10  $\mu$ M EdU 24 hours after transfection, EdU was detected and nuclear EdU sum intensities of S-phase cells are plotted. Independent experiments were done twice (A) or in triplicates (B) and all boxes and whiskers are as in Supplementary Figure 10. *p* and *n*-values are summarized in Supplementary Table 8. Full gels are shown in Supplementary Figure 7. \*\*\* *p* < 0.001.



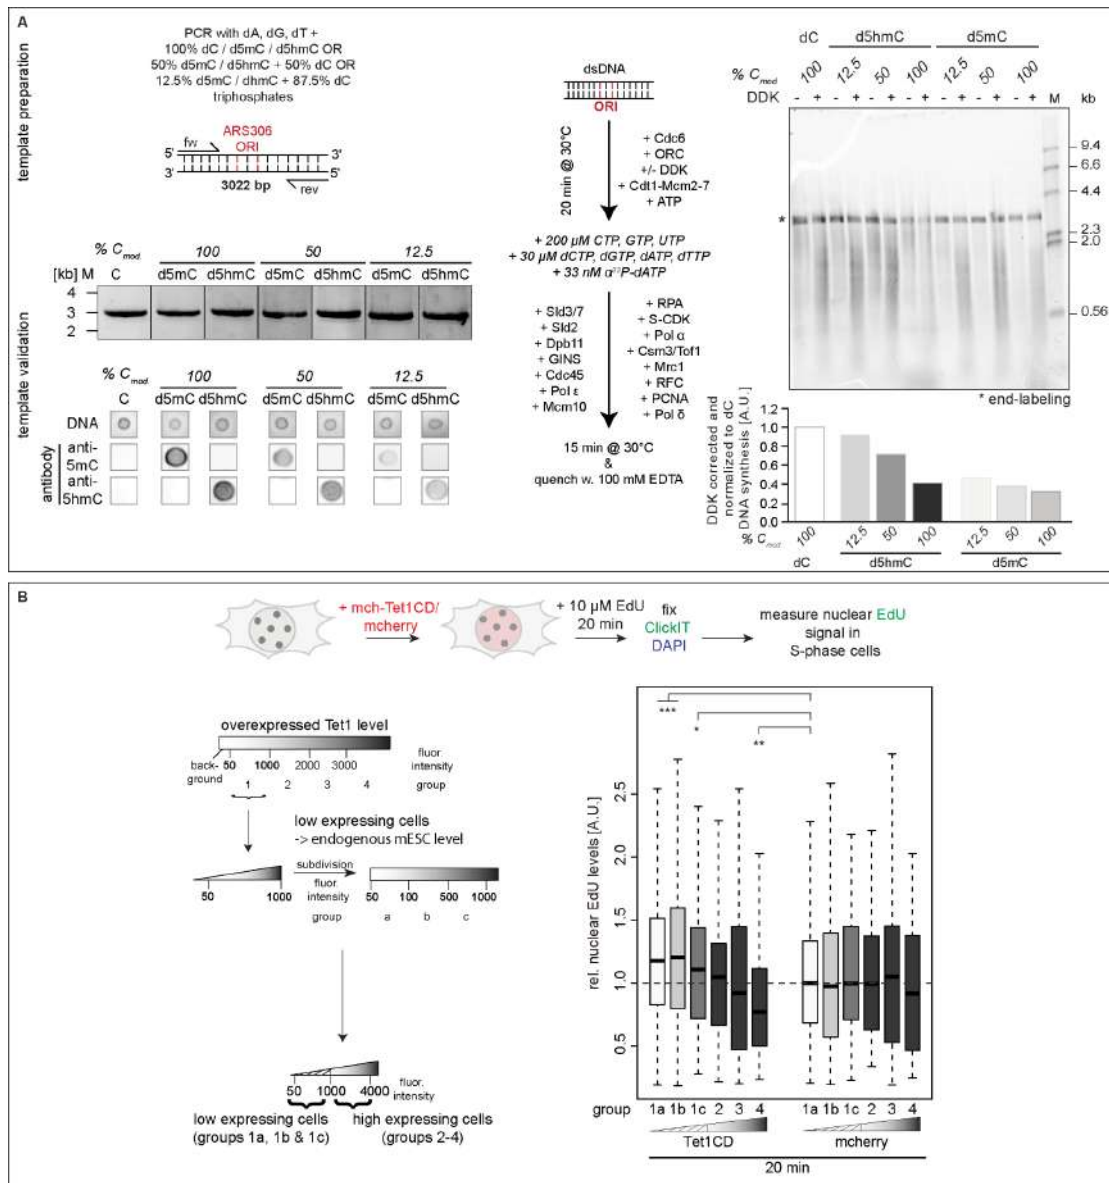

**Supplementary Figure 15 – Effect of various amounts of cytosine modifications on eukaryotic DNA polymerase activity. (A)** Experimental setup and biochemical validation of the template generation for *in vitro* polymerization assays. Template DNA contained 100% cytosine (dC) or 100%, 50% or 12.5% methylcytosine (d5mC) or hydroxymethylcytosine (d5hmC), respectively (except primer sites). The 3 kb templates also contained a centrally arranged yeast ARS306 origin of replication. Exemplary agarose gel images and slot blot analysis of dC, d5mC and d5hmC levels for every nucleotide composition are shown. Experimental setup for soluble replication assay using purified *S. cerevisiae* replisome components. Exemplary alkaline agarose gel images are shown and DDK subtracted and normalized replicated DNA signal intensities (< 3 kb end-labeling band (labeled with \*), normalized to dC) as a proxy for DNA polymerization are shown. **(B)** Schematic representation of the experimental setup for *in vivo* nucleotide incorporation analysis and representation of the cell grouping and binning approach applied. Cells were divided into four main groups, depending on their Tet1CD/mcherry expression levels (group 1: low expressing cells and groups 2-4: high expressing cells). Cells with Tet1 expression levels corresponding to group 1 (fluorescence intensity 50-1000, low Tet1 expressing cells) were further subdivided in three subgroups (fluorescent intensities group 1a: 50-100, group 1b: 100-500 and group 1c: 500-1000) during plotting. Cells were incubated with 10 μM EdU 24 hours after transfection, EdU was detected and nuclear EdU sum intensities of S-phase cells are plotted.

Data from groups 1a-1a are the same as plotted in Figure 5B. Independent experiments were done twice (A) or in triplicates (B) and all boxes and whiskers are as in Supplementary Figure 10.  $p$  and  $n$ -values are summarized in Supplementary Table 8. Full gels are shown in Supplementary Figure 7. \*  $p < 0.05$ , \*\*  $p < 0.005$  and \*\*\*  $p < 0.001$ .

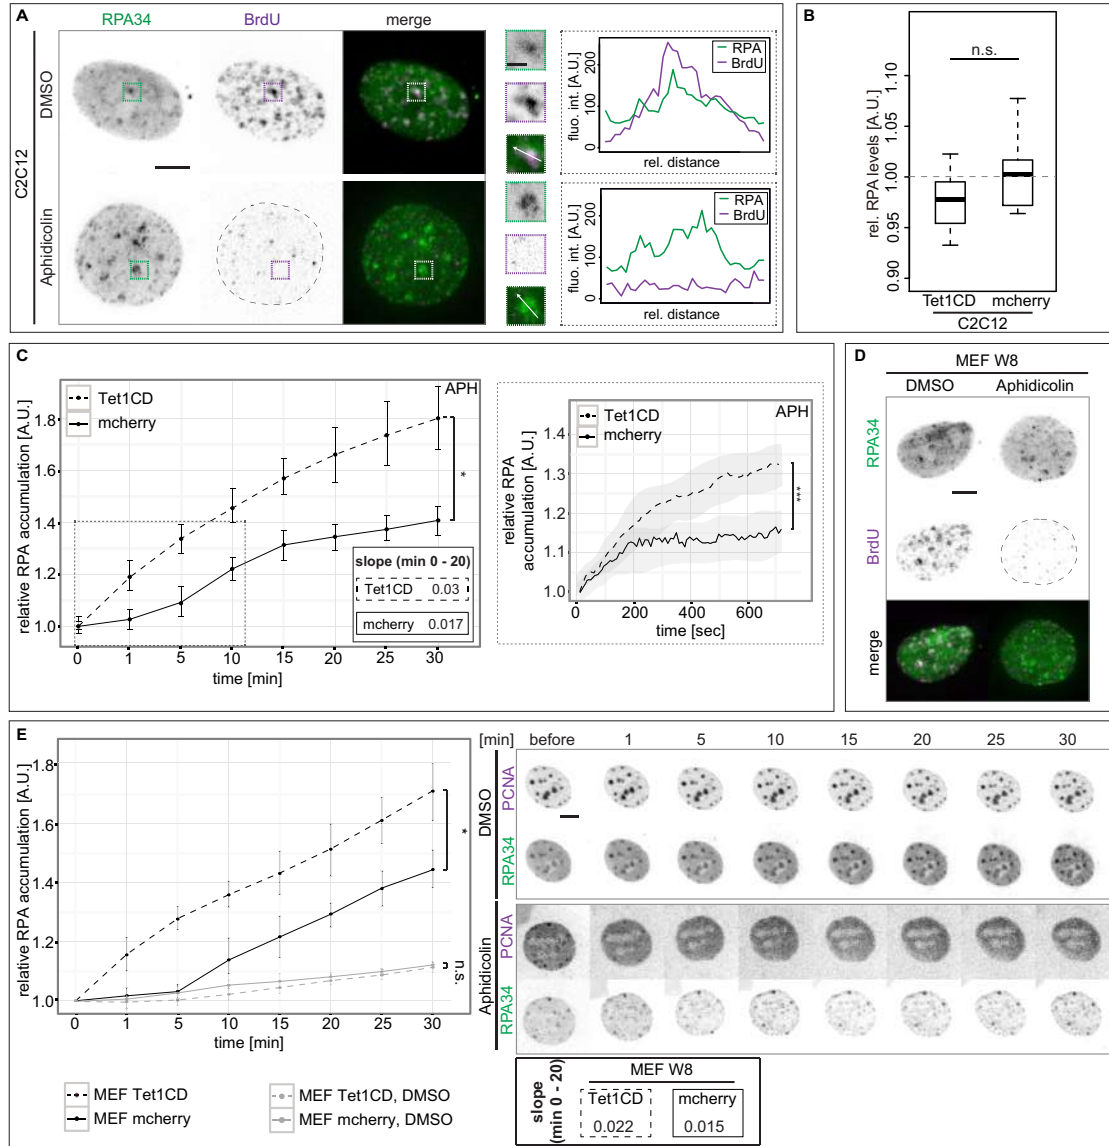

**Supplementary Figure 16 – Effect of cytosine modifications on DNA helicase activity *in vivo*.** (A) Representative spinning disk confocal images showing the localization of GFP-RPA and the (lack of) BrdU incorporation in late C2C12 S-phase cells after DMSO or aphidicolin treatment. Dashed boxes represent the selected magnified ROIs for line intensity profile analysis (arrows). Line intensity plots of BrdU (magenta) and RPA (green) through a replicating chromocenter in late C2C12 S-phase cells before and 30 minutes after aphidicolin/DMSO addition are shown. (B) Relative GFP-RPA sum intensities 24 hours after C2C12 triple transfection, showing no significant difference of RPA levels within the different transfection conditions. (C) Graphs showing the normalized average RPA accumulation ( $c_v \pm$  standard deviation) over 30 minutes at 5 minutes interval imaging (left) and over 12 minutes at 10 seconds interval (right) for aphidicolin treated C2C12 S-phase cells, respectively (as in Figure 6B). Slopes of the RPA accumulation were calculated as in Figure 6B. (D) Representative spinning disk confocal images of BrdU incorporation in aphidicolin and DMSO treated MEF W8 cells. (E) Analysis, representation and slopes of RPA accumulation for triple transfected MEF W8 cells are as in (B). Representative spinning disk confocal images of time-lapse microscopy upon aphidicolin treatment of showing RPA and PCNA localization in aphidicolin and DMSO treated MEF cells. Scale bars = 5  $\mu$ m (whole nuclei images) and 2.5  $\mu$ m (magnifications). All boxes and whiskers are as in Supplementary Figure 10 and  $p$  and  $n$ -values are summarized in Supplementary Table 8. \*  $p < 0.05$  and n.s.: non-significant.

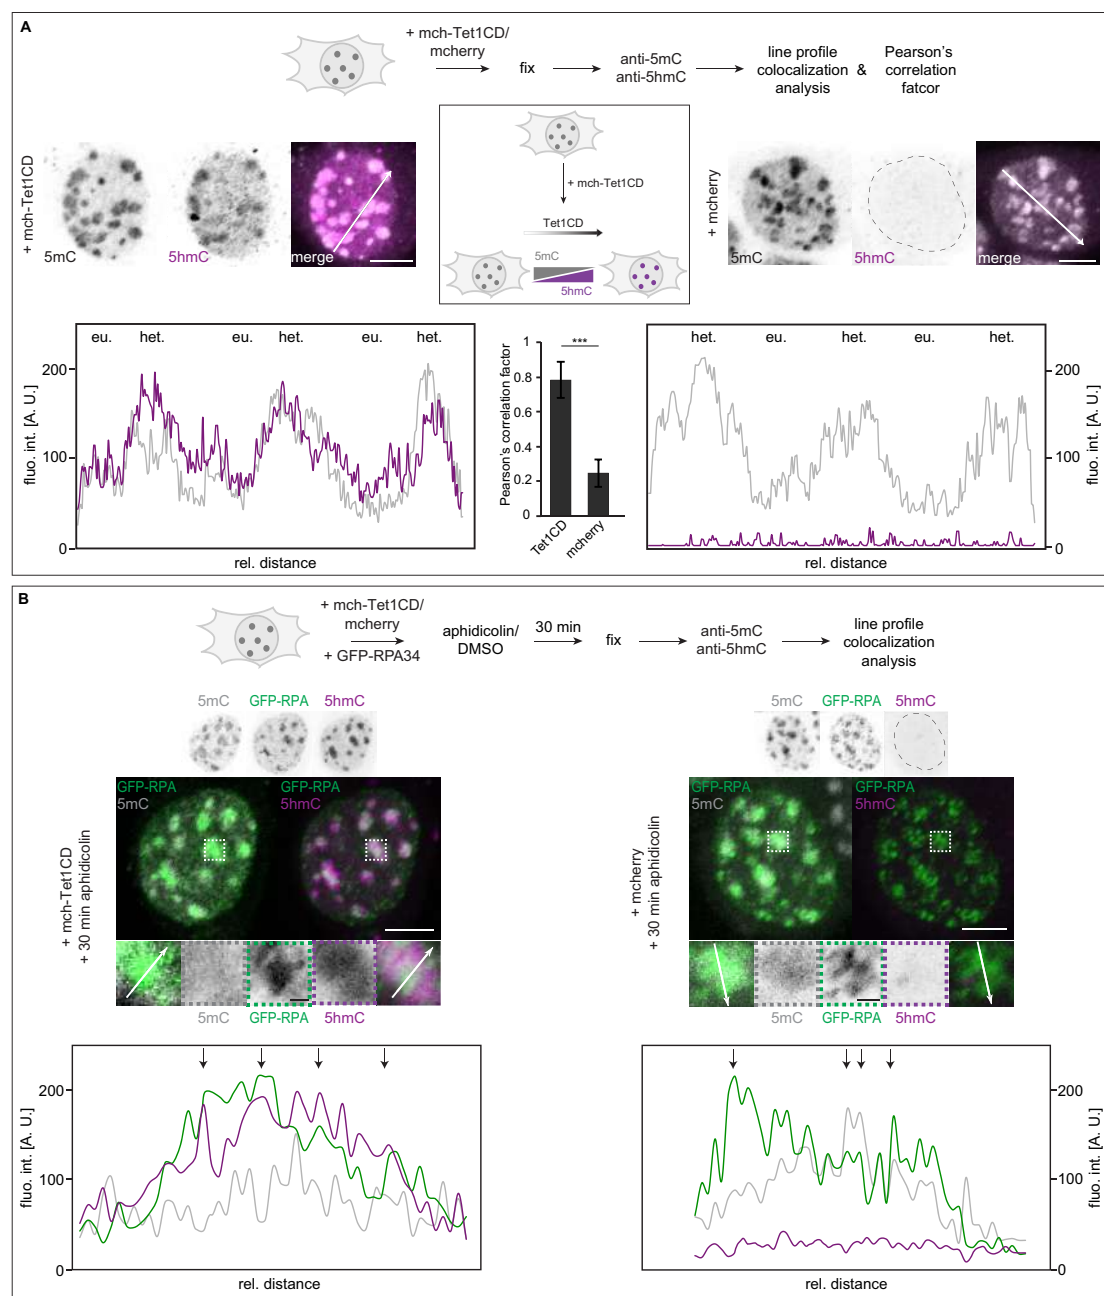

**Supplementary Figure 17 – Colocalization analyses of cytosine modifications and DNA replication in mcherry-Tet1CD/mcherry transfected cells. (A)** 24 hours after mcherry-Tet1CD/mcherry transfection, cells were fixed and co-stained for 5mC (grey) and 5hmC (magenta). Line profile analyses and Pearson's correlation factors (mean  $\pm$  StDev) of 5mC and 5hmC are shown. Line profiles are measured along the white arrow depicted in the images. **(B)** 24 hours after mcherry-Tet1CD/mcherry and GFP-RPA double transfection, cells were treated for 30 minutes with aphidicolin or DMSO, fixed and co-stained for 5mC and 5hmC. Line profile analyses of late S-phase for 5mC (grey), 5hmC (magenta) and GFP-RPA (green) are shown for each condition. Line profiles are measured along the white arrow depicted in the images. Black arrows in the plots highlight regions of high GFP-RPA and 5mC and/or 5hmC colocalization. Scale bar = 5  $\mu$ m (whole nuclei) and 2.5  $\mu$ m (magnifications). Dotted lines represent nuclei contours. eu.: euchromatin, het.: heterochromatin and \*\*\*  $p < 0.001$ .

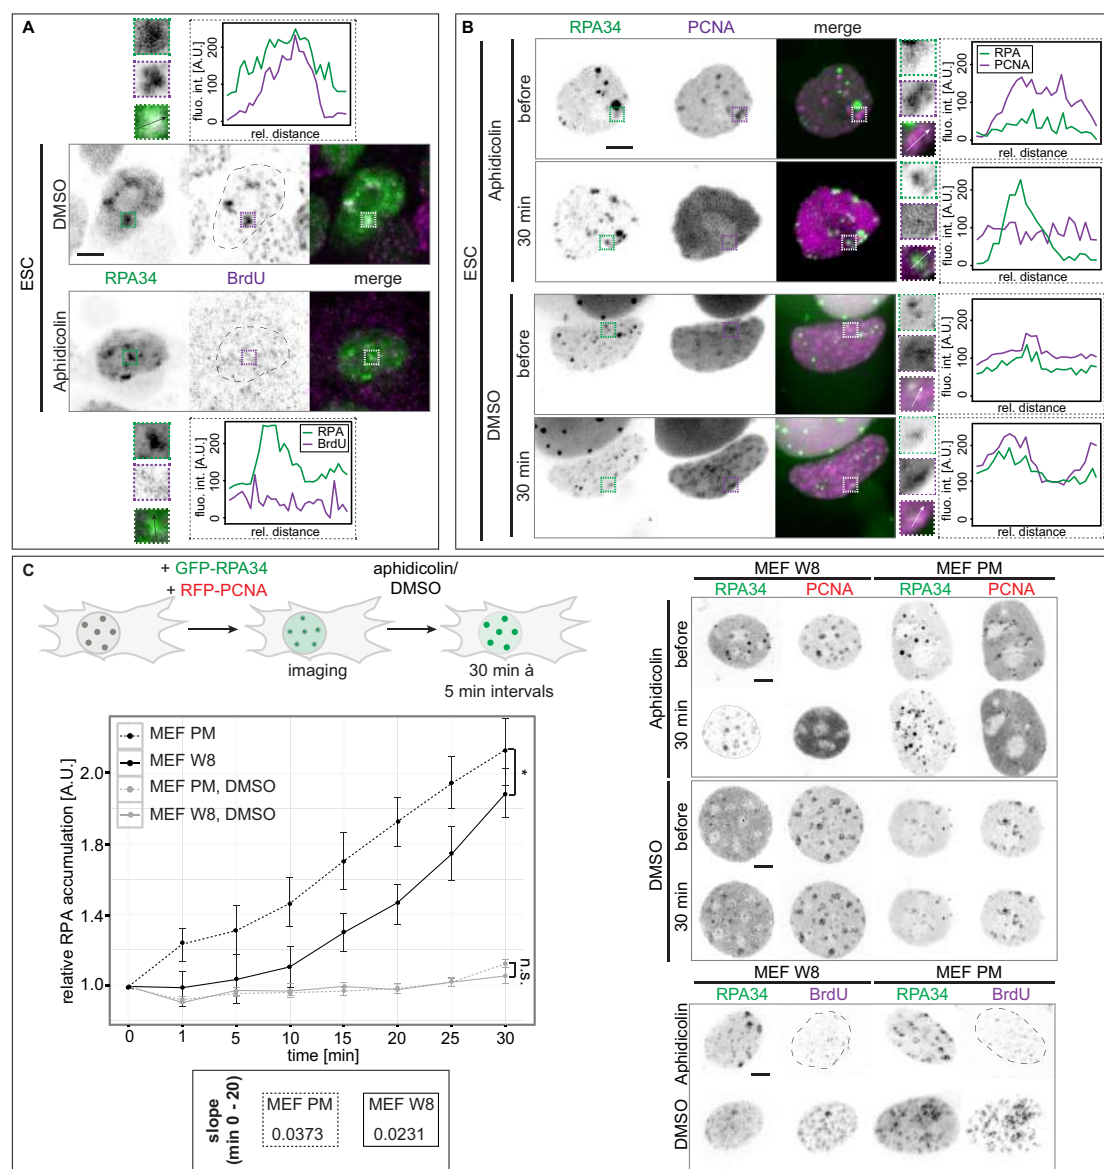

**Supplementary Figure 18 – Effect of loss of cytosine methylation on DNA helicase activity *in vivo*.** **(A)** Representative spinning disk confocal images showing the localization of GFP-RPA and the (lack of) BrdU incorporation in stage II J1 ES cells after aphidicolin/DMSO treatment. Dashed boxes represent the selected magnified ROIs for line intensity profile analysis (white arrows). Line intensity plots of BrdU and RPA are as described in Figure 6B. **(B)** Representative spinning disk confocal time-lapse microscopy images of aphidicolin and DMSO treated J1 cells as in Figure 6B. Dashed boxes represent the selected magnified ROIs for line intensity profile analysis (arrows) before and 30 minutes after aphidicolin/DMSO addition. **(C)** MEF W8 and MEF PM cells were co-transfected with GFP-RPA and RFP-PCNA 24 hours before imaging and imaging and analysis of RPA accumulation and slopes of double transfected MEF cells as in Figure 6B. Representative spinning disk confocal images before and after 30 minutes of aphidicolin/DMSO treatment showing RPA localization and BrdU incorporation after 30 minutes of aphidicolin/DMSO treatment are shown. Dashed lines represent nuclear contours. Scale bars = 5  $\mu$ m. All boxes and whiskers are as in Supplementary Figure 10. *p* and *n*-values are summarized in Supplementary Table 8. \* *p* < 0.05 and n.s.: non-significant.

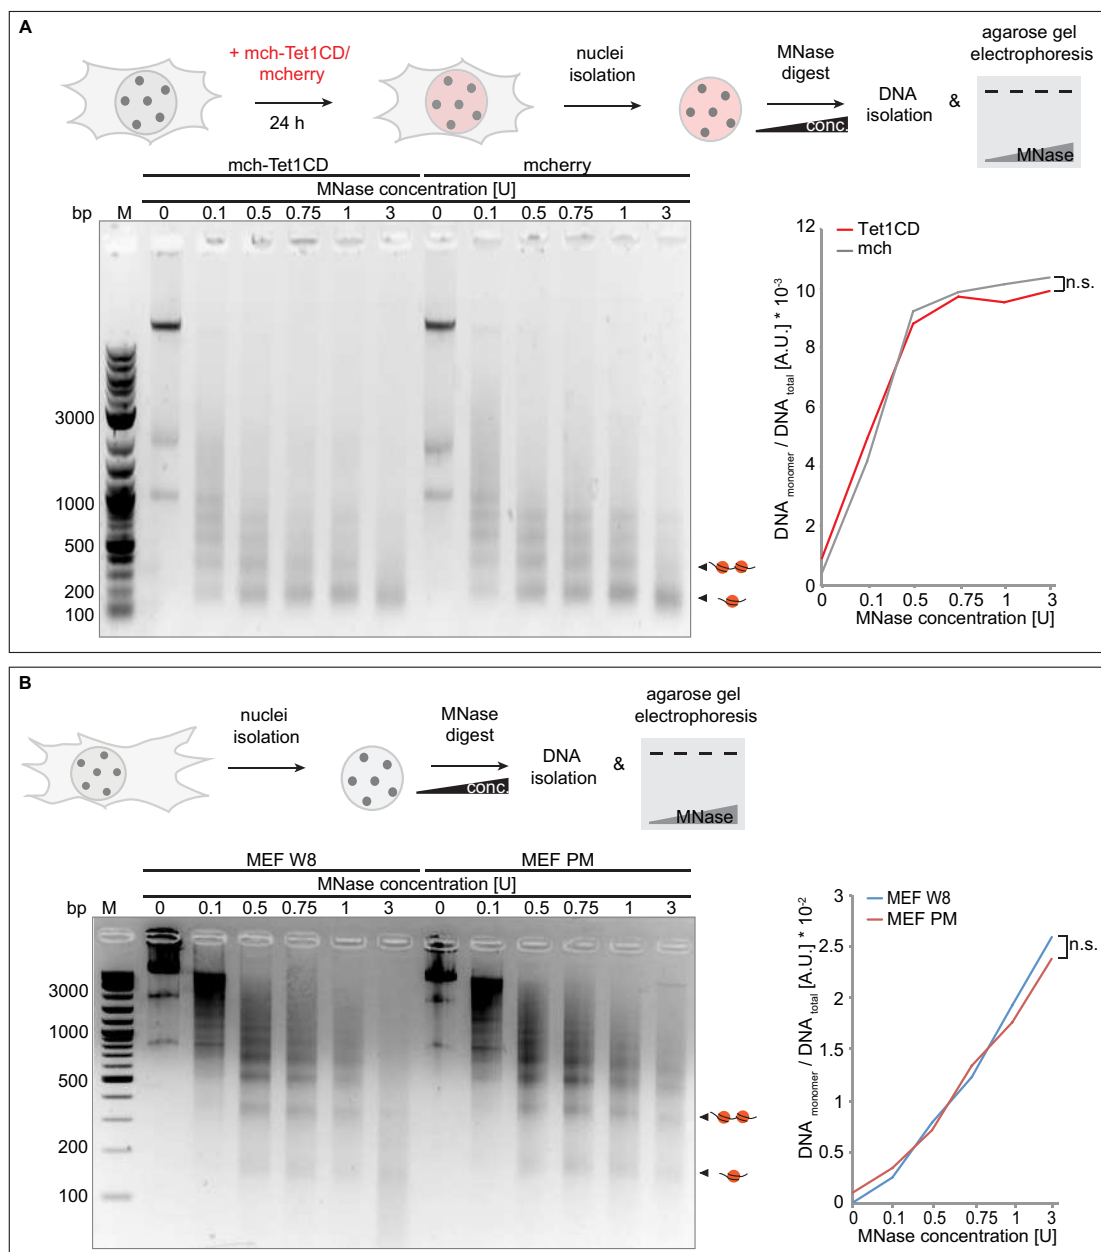



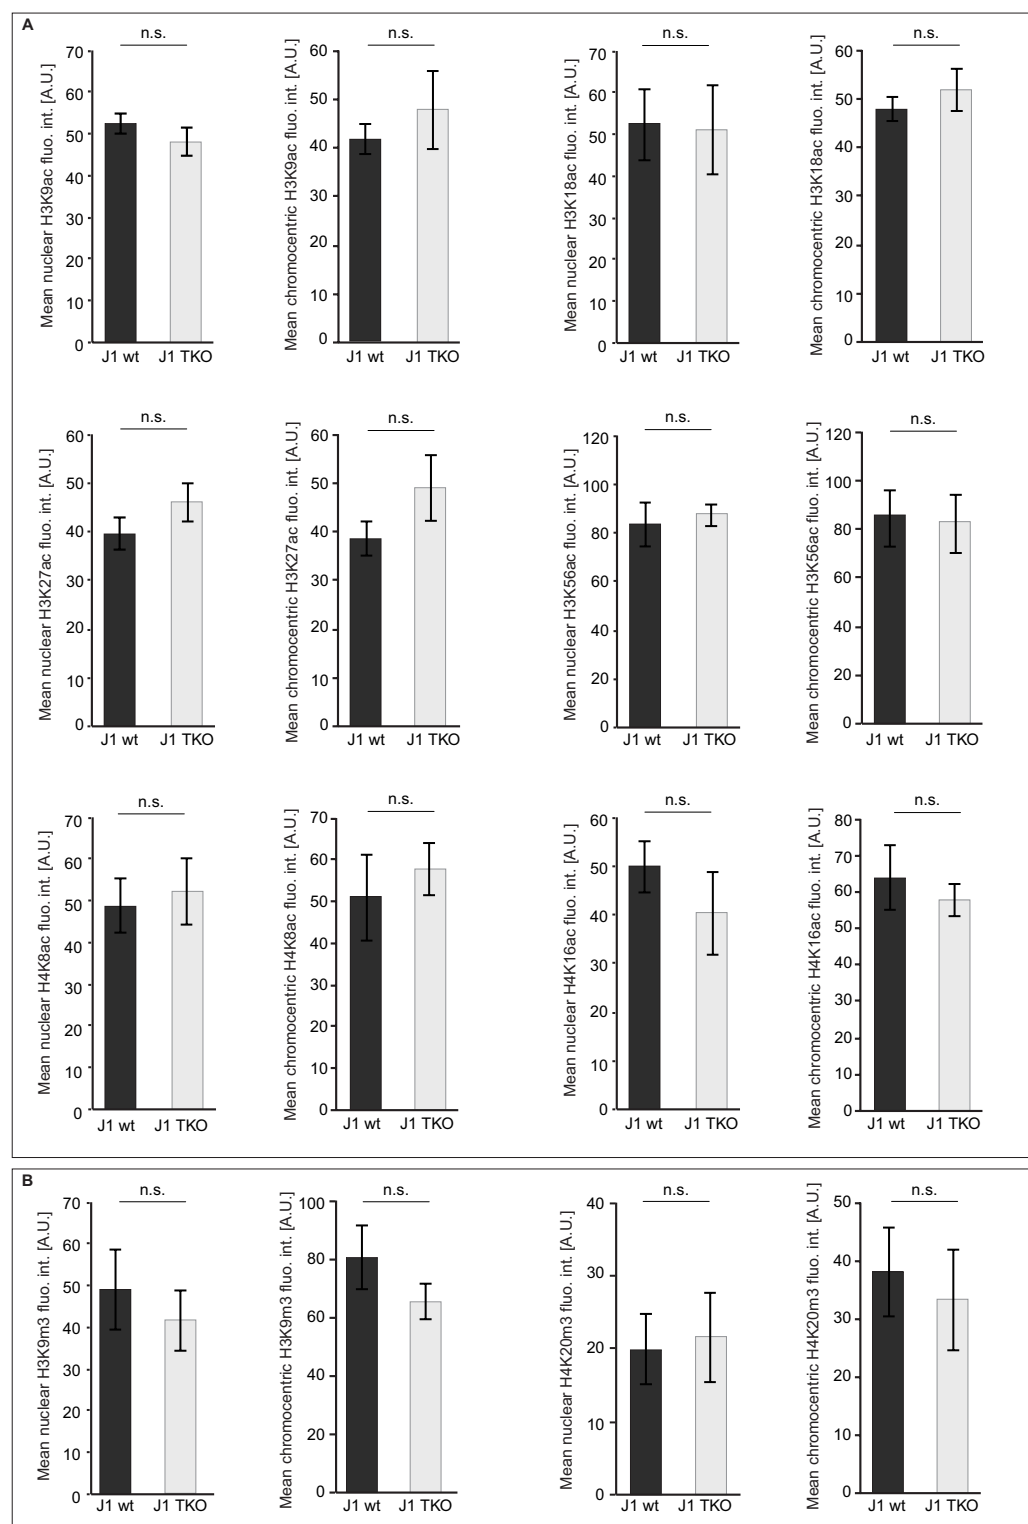

**Supplementary Figure 20 – Effect of loss of global DNA methylation on histone modifications in ES cells. (A-B)** Mouse J1 and TKO ES cells were pulse labelled with EdU, fixed and EdU was detected in combination with histone modifications. The nuclear and chromocentric levels of histone acetylation (**A**, H3K9ac, H3K18ac, H3K27ac, H3K56ac, H4K8ac and H4K16ac) and methylation (**B**, H3K9m3 and H4K20m3) were measured in non-replicating (EdU negative) cells. Error bars represent standard deviation. Independent experiments were done in duplicates. *p* and *n*-values are summarized in Supplementary Table 8. n.s.: non-significant.

## REFERENCES

1. Weber, P., Rausch, C., Scholl, A. and Cardoso, M.C. (2019) Repli-FISH (Fluorescence in Situ Hybridization): Application of 3D-(Immuno)-FISH for the study of DNA replication timing of genetic repeat elements. *OBM Genetics*, **3**.
2. Zhang, P., Hastert, F.D., Ludwig, A.K., Breitwieser, K., Hofstätter, M. and Cardoso, M.C. (2017) DNA base flipping analytical pipeline. *Biology Methods and Protocols*, **2**, 1-12.
3. Zhang, P., Ludwig, A.K., Hastert, F.D., Rausch, C., Lehmkuhl, A., Hellmann, I., Smets, M., Leonhardt, H. and Cardoso, M.C. (2017) L1 retrotransposition is activated by Ten-eleven-translocation protein 1 and repressed by methyl-CpG binding proteins. *Nucleus*, **8**, 548-562.
4. Merkl, P.E., Pilsl, M., Fremter, T., Schwank, K., Engel, C., Längst, G., Milkereit, P., Griesenbeck, J. and Tschochner, H. (2020) RNA polymerase I (Pol I) passage through nucleosomes depends on Pol I subunits binding its lobe structure. *Journal of Biological Chemistry*, **295**, 4782-4795.
5. Ludwig, A.K., Zhang, P., Hastert, F.D., Meyer, S., Rausch, C., Herce, H.D., Müller, U., Lehmkuhl, A., Hellmann, I., Trummer, C. *et al.* (2017) Binding of MBD proteins to DNA blocks Tet1 function thereby modulating transcriptional noise. *Nucleic Acids Research*, **45**, 2438-2457.
6. Sporbert, A., Domaing, P., Leonhardt, H. and Cardoso, M.C. (2005) PCNA acts as a stationary loading platform for transiently interacting Okazaki fragment maturation proteins. *Nucleic acids research*, **33**, 3521-3528.
7. Sporbert, A., Gahl, A., Ankerhold, R., Leonhardt, H. and Cardoso, M.C. (2002) DNA polymerase clamp shows little turnover at established replication sites but sequential de novo assembly at adjacent origin clusters. *Mol Cell*, **10**, 1355-1365.
8. Zillmann, M., Zapp, M.L. and Berget, S.M. (1988) Gel electrophoretic isolation of splicing complexes containing U1 small nuclear ribonucleoprotein particles. *Mol Cell Biol*, **8**, 814-821.
9. Yaffe, D. and Saxel, O. (1977) Serial passaging and differentiation of myogenic cells isolated from dystrophic mouse muscle. *Nature*, **270**, 725-727.
10. Peters, A.H., O'Carroll, D., Scherthan, H., Mechtler, K., Sauer, S., Schofer, C., Weipoltshammer, K., Pagani, M., Lachner, M., Kohlmaier, A. *et al.* (2001) Loss of the Suv39h histone methyltransferases impairs mammalian heterochromatin and genome stability. *Cell*, **107**, 323-337.
11. Lande-Diner, L., Zhang, J., Ben-Porath, I., Amariglio, N., Keshet, I., Hecht, M., Azuara, V., Fisher, A.G., Rechavi, G. and Cedar, H. (2007) Role of DNA methylation in stable gene repression. *J Biol Chem*, **282**, 12194-12200.
12. Graham, F.L., Smiley, J., Russell, W.C. and Nairn, R. (1977) Characteristics of a human cell line transformed by DNA from human adenovirus type 5. *The Journal of general virology*, **36**, 59-74.
13. Li, E., Bestor, T.H. and Jaenisch, R. (1992) Targeted mutation of the DNA methyltransferase gene results in embryonic lethality. *Cell*, **69**, 915-926.
14. Tsumura, A., Hayakawa, T., Kumaki, Y., Takebayashi, S., Sakaue, M., Matsuoka, C., Shimotohno, K., Ishikawa, F., Li, E., Ueda, H.R. *et al.* (2006) Maintenance of self-renewal ability of mouse embryonic stem cells in the absence of DNA methyltransferases Dnmt1, Dnmt3a and Dnmt3b. *Genes Cells*, **11**, 805-814.
15. Rottach, A., Kremmer, E., Nowak, D., Leonhardt, H. and Cardoso, M.C. (2008) Generation and characterization of a rat monoclonal antibody specific for multiple red fluorescent proteins. *Hybridoma*, **27**, 337-343.
